## **Primate-conserved Carbonic Anhydrase IV and murine-restricted Ly6c1 are new targets for crossing the blood-brain barrier**

Timothy F. Shay<sup>1\*†</sup>, Erin E. Sullivan<sup>1†</sup>, Xiaozhe Ding<sup>1†</sup>, Xinhong Chen<sup>1</sup>, Sripriya Ravindra Kumar<sup>1</sup>, David Goertsen<sup>1</sup>, David Brown<sup>1</sup>, Jost Vielmetter<sup>1</sup>, Máté Borsos<sup>1</sup>, Annie W. Lam<sup>1</sup>, Viviana Gradinaru<sup>1\*</sup>

### **Affiliations**

<sup>1</sup>Division of Biology & Biological Engineering, California Institute of Technology; Pasadena, CA, USA.

† These authors contributed equally to this work

\*Co-corresponding author: T.F.S. ([tshay@caltech.edu](mailto:tshay@caltech.edu))

\*Co-corresponding author: V.G. ([viviana@caltech.edu](mailto:viviana@caltech.edu))

## Abstract

The blood-brain barrier (BBB) presents a major challenge to delivering large molecules to study and treat the central nervous system (CNS). This is due in part to the scarcity of effective targets for BBB crossing, the identification of which is the crucial first step of drug development. Here, we leveraged a panel of adeno-associated viruses (AAVs) previously identified through directed evolution for improved BBB transport to reverse engineer protein targets for enhanced BBB crossing. We identify both murine-restricted Ly6c1 and primate-conserved carbonic anhydrase IV (Car4; CA4) as novel receptors for crossing the BBB. We demonstrate how these receptors can unlock new experimental and computational target-focused engineering strategies by creating the enhanced Ly6c1-binding vector AAV-PHP.eC and by applying AlphaFold2-enabled *in silico* methods to rank capsids against identified receptors and generate capsid-receptor binding models. Here, with Car4, we add a completely new receptor to the very short list currently available for crossing the BBB in humans and, with Ly6c1, we validate a pipeline for receptor-targeted engineering. The identification of Car4/CA4 and structural insights from computational modeling provide new paths toward human brain-penetrant chemicals (drugs) and biologicals (including gene delivery).

1 **Main Text:**

2 **INTRODUCTION**

3 The blood-brain barrier (BBB) presents a fundamental bottleneck to the development of effective  
4 research tools and therapeutics for the central nervous system (CNS)(1–3). This structure,  
5 comprised mainly of brain endothelial cells(2, 4) requires large molecules to be delivered via  
6 invasive intracranial injections, technically challenging focused ultrasound(5), or receptor-  
7 mediated transcytosis(6, 7). Rational design of BBB-crossing large molecules has long been  
8 hampered by our imperfect understanding of the mechanisms involved in transcytosis, with only  
9 a handful of targets, such as transferrin receptor(8–11), validated for research and therapies(7, 12–  
10 14).

11 Directed evolution is a powerful method for generating biomolecules with enhanced fitness  
12 for desired properties despite an incomplete understanding of the underlying biological  
13 systems(15). Importantly, the outcomes of directed evolution libraries could in turn be used to  
14 unlock new biology by probing the mechanism of action for molecules with evolved properties.  
15 We have decided to apply this paradigm of reverse-engineering directed evolution hits to the  
16 accumulating wealth of data resulting from selective pressure on adeno-associated virus (AAV)  
17 libraries for CNS enrichment after systemic administration(16–25).

18 One such improved rodent BBB-crossing AAV capsid is PHP.eB(26), which we previously  
19 identified by Cre-recombination-based AAV targeted evolution (CREATE) method(17) on the  
20 parent capsid AAV9(27, 28). Following systemic injection in genetically divergent mouse strains,  
21 capsids such as PHP.eB can either show potent CNS tropism (as in C57BL/6J, FVB/NCrl, and  
22 DBA/2J) or akin to AAV9 (as in BALB/cJ)(29–31). In non-human primates (NHPs), PHP.eB and

23 others display AAV9-like CNS infectivity(29, 32–34). As AAVs have become the vector of choice  
24 for human gene therapies, including for therapies of the CNS(35–37), complications from directly  
25 applying mouse-evolved AAVs in new genetic backgrounds contributed to a shift toward  
26 performing AAV directed evolution in NHPs. In so doing, researchers hope to increase the  
27 likelihood of identifying AAVs whose enhanced tropism will translate to humans.

28 As both the pre-clinical validation and, increasingly, the generation of engineered capsids  
29 occurs in NHPs however(34, 38, 39), the animals' scarcity(40, 41) and costs slow the identification  
30 of engineered capsids while the risk of NHP-specific AAVs entering clinical trials remains.  
31 Nevertheless, examples are beginning to accumulate of capsids that can cross both rodent and NHP  
32 BBB(34) but, of utter importance, also of at least one capsid reported to cross the macaque but not  
33 the rodent BBB(39). Collectively, this diverse set of capsids engineered over the past decade by  
34 many groups represents, through their yet unexplored mechanisms of action, an unprecedented  
35 opportunity to start unraveling new targets for crossing the BBB across strains and species.

36 As patients treated with any AAV are likely to develop neutralizing antibodies toward most  
37 future AAVs and preclude them from future AAV treatments(35, 36), methods to efficiently  
38 identify targets of brain-enhanced AAVs are critically necessary. Thus, NHP-optimized and  
39 validated AAV capsids that might not cross the human BBB are a concerning possibility. Here,  
40 we demonstrate a path forward by identifying protein targets or BBB-crossing mechanisms that  
41 may directly translate to human drug development. Using brain-enhanced engineered AAVs  
42 previously identified by directed evolution selections in mice(20, 22, 24, 34), we validate a  
43 pipeline to reverse engineer targets for potent BBB crossing. Focusing on engineered AAVs whose  
44 enhanced CNS infectivity upon systemic injection in mice is conserved across both C57BL/6J and  
45 BALB/cJ strains(20, 22, 24), we identified using an in vitro screening model with in vivo

46 validation two novel receptors for enhanced BBB crossing by engineered AAVs: murine-restricted  
47 Ly6c1 and primate-conserved carbonic anhydrase IV (Car4; CA4).

48 To demonstrate how a known target can unlock new engineering strategies, (1) we created  
49 an enhanced Ly6c1-binding AAV variant, AAV-PHP.eC, (2) we utilized a new method for  
50 Automated Pairwise Peptide-Receptor Analysis for Screening Engineered AAVs (APPRAISE-  
51 AAV for short) that uses AlphaFold2(42) to screen peptides against potential receptors in silico  
52 and (3) we generated AAV-receptor interaction models, including the first high-resolution binding  
53 model of PHP.eB with Ly6a. Our experimental and computational pipeline for learning how  
54 evolved AAVs enact their enhanced BBB crossing tropisms demonstrates target-driven capsid  
55 engineering with Ly6c1 and establishes in vivo that carbonic anhydrase IV is a receptor target for  
56 enhanced CNS transduction by AAVs with translational promise.

## 57 **RESULTS**

### 58 **Identification of engineered AAVs that do not utilize Ly6a**

59 Ly6a is the receptor responsible for the enhanced CNS tropism of PHP.B and PHP.eB in mice(43–  
60 45), and one strain-specific SNP disrupts its GPI-anchored membrane localization (Fig. 1a)(45).  
61 Previously, we applied our M-CREATE directed evolution selection platform to a library of AAV9  
62 variants (containing seven-amino-acid insertions at position 588 of capsid variable region VIII),  
63 identifying a family of engineered AAVs with diverse CNS tropisms and a shared sequence motif,  
64 typified by their founding member, AAV-PHP.B (Fig. 1b)(22). The variants' enhanced CNS  
65 potency is lacking in BALB/cJ mice, a phenomenon explained by their shared reliance on Ly6a  
66 for BBB crossing(43–45). Recently, multiple engineered AAVs outside the PHP.B sequence  
67 family which retain their enhanced CNS tropism in BALB/cJ mice were identified(20, 22, 24).

68 Before attempting to de-orphanize these AAVs, we first sought to confirm their independence of  
69 Ly6a.

70 To directly probe potential Ly6a binding interactions, we performed surface plasmon  
71 resonance (SPR). To ensure the detection of even weak interactions, we dimerized Ly6a by fusion  
72 to Fc and immobilized it at high density on a protein A chip, and tested each AAV analyte across  
73 a range of concentrations (Fig. 1c). As expected, AAV9 showed no evidence of binding at any  
74 concentration, and PHP.B sequence family members all showed strong binding interactions with  
75 Ly6a. While precise affinities could not be determined due to the effects of avidity and mass  
76 transport, the interaction profiles were consistent with sub-nanomolar affinities. Conversely, all  
77 BALB/cJ-enhanced engineered AAVs were indistinguishable from AAV9, exhibiting no  
78 detectable interaction with Ly6a.

### 79 **Construction of a cell culture screen for putative receptors of engineered AAVs**

80 Reasoning that a receptor that engineered AAVs can co-opt for efficient BBB crossing is likely to  
81 be both highly expressed and highly specific to the endothelial cells of the brain, we analyzed  
82 previously-collected single-cell RNA sequencing data from dissociated C57BL/6J brain tissue  
83 (Fig. 2a)(46). We investigated gene expression levels within CNS endothelial cell clusters and  
84 differential expression compared to all other CNS cell type clusters. Genes were filtered to select  
85 only those annotated in Uniprot as localized to the plasma membrane before calculating their  
86 endothelial cell differential expression score in scanpy. This score was then plotted against each  
87 transcript's mean abundance, revealing a long tail of highly expressed and highly specific CNS  
88 endothelial membrane proteins. Encouragingly, Ly6a appeared at the far reaches of this tail. From  
89 this analysis, we selected a panel of 40 abundant and specific candidate receptors (Table S1).

90 We and others have observed that expression of membrane-localized Ly6a in HEK293  
91 cells selectively improves the potency of PHP.eB infection compared to AAV9 at low multiplicity  
92 of infection (MOI), with extent of infection and brightness of infected cells markedly increased  
93 (Fig. S1a)(45). Hypothesizing that this property is likely to be conserved among BBB-crossing  
94 receptors, we made this behavior the basis of a receptor transient overexpression screen (Fig. 2b-  
95 c). We cloned the C57BL/6J coding sequence of each of the 40 candidate receptors into a  
96 mammalian expression plasmid and tested each against engineered AAVs in triplicate at two  
97 different doses (Fig. 2a, 2d). PHP.eB and Ly6a served as a positive control.

98 As expected, we found that all members of the PHP.B sequence family showed a marked  
99 boost in infectivity in Ly6a-transfected cells compared to untransfected cells, while Ly6a-  
100 independent AAVs performed identically in both conditions (Fig. 2d-e, & Fig. S1b). Interestingly,  
101 the infectivity of all Ly6a-dependent capsids was boosted to a similar extent (Fig. S2b).

### 102 **Identification of Ly6c1 and Car4 as receptors for BBB crossing of Ly6a-independent** 103 **engineered AAVs**

104 We observed boosts in infectivity for all tested Ly6a-independent AAVs with novel receptors (Fig.  
105 2d). Surprisingly, given their different sequence families, all of the initial Ly6a-independent AAVs  
106 responded to the same candidate receptor, Ly6c1 (Fig. 2d-g and Fig. S1b). In addition, despite its  
107 Ly6a-dependent pattern of CNS infectivity across murine strains(22), PHP.N also exhibited  
108 enhanced infectivity in Ly6c1-transfected cells. At a higher dose, PHP.N outperformed both  
109 AAV9 and PHP.eB in CBA/J mice (Fig. S3), which express a GPI-disrupted Ly6a. While  
110 polymorphisms in Ly6c1 exist between mouse strains (as shown by a published analysis of the 36  
111 mouse strains for which whole genomes are available (45)), we found that, unlike Ly6a, none of  
112 the polymorphisms were predicted to disrupt GPI-anchoring of Ly6c1 to the plasma membrane

113 using PredGPI(47). To determine the specificity of the Ly6c1 interaction, we performed a follow-  
114 up screen with additional closely-related and CNS-expressed Ly6 superfamily members, and  
115 found no cross-reactivity of Ly6c1-dependent AAVs with other Ly6 proteins (Fig. 2g). CAP-B10  
116 and CAP-B22, which have seven amino acid substitutions in capsid variable region IV and show  
117 enhanced potency in adult marmosets(34), did not exhibit any additional receptor interactions that  
118 would explain their NHP tropism in either of the screens described above or a third screen with  
119 marmoset CNS-expressed Ly6 family members (Fig. S2c). Nor did any Ly6-interacting AAV  
120 cross-react with the recently described human Ly6S, a close relative of murine Ly6a (Fig. 2g)(48).

121 We also expanded the Ly6 follow-up screen to include a second set of seven previously  
122 identified engineered AAVs (9P)(24), which yielded additional five Ly6a and Ly6c1-interacting  
123 AAVs (Fig. 2g). The 9P AAVs 9P31 and 9P36, however, did not display enhanced infectivity with  
124 any Ly6 protein in the panel and so were tested on the full receptor screen (Fig. 2d). Both 9P31  
125 and 9P36 displayed an infectivity boost with the GPI-linked enzyme carbonic anhydrase IV (Car4;  
126 CA4)(Fig. 2d and Fig. S1b). This interaction was specific to Car4 among membrane-associated  
127 carbonic anhydrases (Fig. 2g). As with Ly6c1, polymorphisms in Car4 across mouse strains are  
128 not predicted to impact GPI-anchoring to the plasma membrane(45, 47). Unlike mouse-restricted  
129 Ly6a and Ly6c1, Car4 is conserved throughout vertebrates, including non-human primates and  
130 humans(49–51). Therefore, we chose to confirm our screen results in vivo using Car4-knockout  
131 mice (B6.129S1-Car4tm1Sly/J, Jackson labs strain #008217). Immunofluorescence confirmed that  
132 Car4 is strongly expressed throughout the brain vasculature of homozygous WT/WT mice and  
133 completely absent in KO/KO (Fig. 3a). When dosed with  $3 \times 10^{11}$  v.g. per animal, PHP.eB, 9P31,  
134 and 9P36 all strongly expressed in both the brain and liver of wild-type mice (Fig. 3b). Under the  
135 same conditions in KO/KO mice, PHP.eB was unaffected whereas both 9P31 and 9P36 completely



136 lack enhanced CNS tropism (Fig. 3c and Fig. S3b). Liver tropism, on the other hand, was  
137 decoupled from this effect, with all three viruses showing strong transduction in KO/KO mice. It  
138 is possible that any 9P31 and 9P36 potency differences in the periphery of KO/KO mice might be  
139 due to pharmacokinetic effects of no longer efficiently accessing the CNS.

140 Of note, every AAV we tested showed a moderate boost in infectivity in cells transfected  
141 with *Slco1c1* (also known as *Oatp1c1*), an integral membrane anionic transporter (Fig. 2d). Unlike  
142 for other potential receptors, however, the mNeonGreen signal was weak and diffuse, extending  
143 beyond cell boundaries (Fig. S1c), suggesting a transgene export or cell health phenotype. The  
144 universality of this effect and the specificity of *Slco1c1* expression in the brain suggests a possible  
145 role in the weak BBB transcytosis of parent AAV9. None of the other 36 candidate receptors  
146 produced a meaningful infectivity boost for any of the 16 engineered AAVs screened.

#### 147 **Directed evolution of an improved Ly6c1-dependent capsid**

148 Next, we aimed to demonstrate a proof-of-concept for receptor-targeted directed evolution. For  
149 this purpose, we chose the murine receptor Ly6c1 (vs. the human Car4) due to prompt availability  
150 of (1) strains with clear BBB differences, e.g. Ly6a, and (2) diverse Cre-transgenic animals for M-  
151 CREATE selections that, for now, are not available for Car4 in other species. In addition, given  
152 the mixed backgrounds of preclinical animal models, it remains important to have mechanistically  
153 distinct gene delivery vectors for rodents. We therefore sought to engineer a single optimized  
154 capsid for broad adoption as a research tool in GPI-disrupted Ly6a mouse strains, a still unmet  
155 need, (Fig. 4) using our previously-developed M-CREATE method for AAV capsid directed  
156 evolution(22). This method uses Cre-dependent AAV genome recovery from desired tissues and  
157 cell types after in vivo selection in Cre-transgenic mice and allows deep characterization of  
158 selected capsids across various cell types and tissues.

159 Using M-CREATE, we constructed scanning 3-mer substitution capsid libraries in the  
160 chemically-diverse Ly6c1-interacting variants PHP.C1, PHP.C2, PHP.C3, and PHP.C4, and  
161 pooled these libraries for two rounds of selection in Syn-Cre mice (Fig. 4a). In the second round  
162 of selection, we also included Olig2-Cre, Tek-Cre, and GFAP-Cre mice, as well as wild-type  
163 C57BL/6J and BALB/cJ mice so that we could detect potential differences in enhancement  
164 between these strains or cell types during selection among the variants (Fig. 4b). Interestingly,  
165 while PHP.C2 variants dominated both rounds of selection in the C57BL/6J background (Cre-  
166 dependent or not), PHP.C1 variants dominated the round 2 Cre-independent selection in BALB/cJ  
167 (Fig. S4). Following selection, we individually produced and characterized top-performing  
168 variants. AAV-PHP.eC (variant 19), evolved from PHP.C1, retained Ly6c1 interaction in cell  
169 culture (Fig. 4c) and outperformed PHP.C2 in multiple mouse strains with membrane-disrupted  
170 Ly6a (Fig. 4d). PHP.eC thus provides a potent tool for transgene delivery in mouse strains without  
171 membrane-localized Ly6a.

## 172 **AlphaFold2-based methods to identify receptor-binding peptides and engineered AAV** 173 **binding poses in silico**

174 Having identified a panel of receptor and AAV capsid pairings, we aimed to see if we could  
175 capitalize on rapid advances in protein structure prediction to generate binding poses for  
176 engineered AAVs and their newly identified receptors. We began by applying an AlphaFold2-  
177 based computational method(42, 52) for Automated Pairwise Peptide Receptor Analysis for  
178 Screening Engineered AAV (APPRAISE-AAV for short). Inspired by recent work(53, 54), this  
179 method uses AlphaFold2 to place surface-exposed peptides spanning mutagenic insertions  
180 (AA587 – 594) from two distinct AAV variants in competition to interact with a potential receptor  
181 (Fig. 5a). This comprises the minimal peptide to encompass the solvent-exposed residues of capsid

182 variable region VIII. A combination of physical and geometric scoring parameters that include  
183 interface energy, binding angle, and binding pocket depth calculations are used to generate a  
184 peptide competition metric. Results from these individual pairwise competitions can be assembled  
185 into larger matrices that rank sets of AAV capsid insertion peptides according to their receptor-  
186 binding probability encoded in the AlphaFold2 neural network. When applied to Ly6a and our  
187 newly identified receptors, we found that the experimentally-verified Ly6a, Ly6c1, and Car4  
188 insertion peptides rise to the top of their respective rankings (Fig. 5b-c). Some false negatives were  
189 also observed, however, as in 9P08 with Ly6a or 9P36 with Car4.

190 In addition to predictions of whether a peptide binds to a receptor, we can also  
191 computationally interrogate the structural details of the binding interaction. We generated binding  
192 poses by pairing the top AAV insertion peptide with its receptor and validated the binding pose  
193 for each pairing by repeating our cell culture screen with receptors containing point mutations  
194 hypothesized to disrupt the high-confidence region of the binding interface (as determined by the  
195 per-residue estimated model confidence pLDDT score and consistency between replicate models)  
196 in these predicted poses.

197 We began by modeling the interaction of PHP.eB with Ly6a so that the wealth of existing  
198 experimental data on this interaction(55–57) could be used to build confidence in our methods  
199 prior to their application in our newly discovered receptor interactions. The PHP.eB peptide is  
200 predicted to nestle in a groove in Ly6a, forming strong interactions at Pro5' and Phe6' (Fig. 5d)  
201 with several Ly6a residues (Fig. 5e). We therefore introduced a point mutation in this groove, Ly6a  
202 Ala58Arg, and found that it disrupts PHP.eB's enhanced infectivity with the wild-type receptor.  
203 This experimental result further bolsters confidence in in silico APPRAISE-AAV rankings.

204 To gain a full picture of the AAV-receptor interaction, we next modeled the PHP.eB  
205 insertion peptide and Ly6a receptor complex within the context of the AAV capsid three-fold  
206 symmetry spike. This structure is challenging for standard modeling tools because of the large size  
207 of an AAV capsid (~200kDa per trimer) as well as the often weak and dynamic binding interactions  
208 between engineered capsids and receptors ( $\mu\text{M}$  affinities possible without avidity(56)).  
209 AlphaFold2 failed to capture direct contact between full-length PHP.eB capsid and Ly6a in either  
210 a monomer-receptor or trimer-receptor configuration. To address this challenge, we developed an  
211 integrative structure modeling pipeline. In this pipeline, an initial model of an AAV capsid trimer  
212 predicted using AlphaFold2-Multimer(52) is structurally aligned with an AlphaFold2-predicted  
213 peptide-receptor complex model through the high-confidence Pro5' and Phe6' residues of the  
214 peptide insertion and RosettaRemodel(58) optimization of the linking peptide residues within the  
215 context of the AAV capsid three-fold symmetry spike (Fig. S5a). This complete binding model  
216 (Fig. 5e), provides a snapshot for a dynamic interaction that has thus far proven resistant to high-  
217 resolution structural characterization(56).

218 The PHP.eB-Ly6a model coheres with available experimental results. RMSD between our  
219 PHP.eB monomer model and a cryo-EM-based model(56) (PDB ID: 7WQO) is 0.36 angstrom.  
220 RMSD increases in PHP.eB's engineered loop to 1.36 angstroms. The only high-confidence  
221 deviation from cryo-EM structures of un-complexed PHP.eB is the side chain of Phe6', which  
222 shows no significant electron density, indicating flexibility, but forms a stable interaction with  
223 Ly6a in our model (Fig. S5b, right). The high confidence prediction of Pro5' and Phe6' aligns with  
224 recent evidence showing that PFK 3-mer insertion alone is sufficient to gain Ly6a binding(57).  
225 While Ly6a can bind any insertion loop of a trimer, additional interactions induce steric clashes  
226 supporting a ratio of one Ly6a per capsid trimer. Interestingly, a PHP.eB-Ly6a complex ensemble

227 image forced to contain 60 bound copies of Ly6a resembles a recently reported CryoEM map,  
228 whose analysis pipeline would average over all 60 singly-occupied binding sites to form a  
229 composite map (Fig. S5c)(56). Our model shows that a single copy of both Ly6a and AAVR PKD2  
230 domain may bind to the same three-fold spike simultaneously without clashing (Fig. S5d), in  
231 agreement with saturation binding experiments(56). Consistent with previous work showing the  
232 Ly6a SNP D63G does not affect PHP.eB binding(45), the residue is greater than 10 angstroms  
233 from the PHP.eB peptide atoms in our models. The PHP.eB-Ly6a complex model includes several  
234 interactions involving AAV insertion-adjacent residues, which is consistent with a previous report  
235 (Figure 5g)(55).

236         Having validated our methods against experimental data for the PHP.eB Ly6a interaction,  
237 we next applied these structural modeling methods to our newly identified receptors. Interestingly,  
238 unlike for Ly6a and Car4, the predicted binding pose for PHP.C2 peptide with Ly6c1 was found  
239 to vary with the version of AlphaFold-Multimer used, with v1 predictions closely matching  
240 mutational data from our cell culture infectivity assay (Fig. S5e). Such complementarity between  
241 versions has been reported previously(59). In mouse Car4, 9P31 peptide invades the catalytic  
242 pocket of the enzyme (Fig. 6a). The 9P31 tyrosine residue shared with 9P36 approaches the  
243 enzyme active site and 9P31's divergent tryptophan finds purchase in an ancillary pocket (Fig.  
244 6b). This predicted binding pose is competitive with the binding site of brinzolamide (PDB ID  
245 3NZC)(60), a broad carbonic anhydrase inhibitor that is prescribed for glaucoma(61). In our cell  
246 culture infectivity assay, brinzolamide shows a dose-dependent inhibition of 9P31 and 9P36  
247 potency while PHP.eB is unaffected (Fig. 6b). The smaller brinzolamide binds deep in the catalytic  
248 core of Car4 where side chains are largely conserved between species (Fig. 6c). 9P31 peptide  
249 however extends to the surface of the enzyme where there is considerable sequence divergence

250 that prevents cross-reactivity across species. Thus, while brinzolamide binds to both mouse and  
251 human Car4(60, 62), 9P31 and 9P36 are selective for mouse Car4 (Fig. 6d). Chimeric receptors  
252 that swap a highly divergent loop of the 9P31 binding site show that this region is necessary but  
253 not sufficient to control 9P31 and 9P36 potency. Engineering a human CA4-binding AAV with  
254 optimal BBB crossing properties is both critically important and not trivial without ready *in vivo*  
255 model systems for validation, as illustrated by the extensive, multi-year efforts realizing transferrin  
256 receptor's potential(8, 9, 63–65).

## 257 **DISCUSSION**

258 The blood-brain barrier restricts access to the CNS by large molecule research tools and  
259 therapeutics, limiting our ability to study and treat the brain(1–4). Here we sought to expand the  
260 roster of protein targets through which biologicals and chemicals may access the CNS by de-  
261 orphanizing engineered AAVs selected through directed evolution for enhanced brain potency.  
262 While directed evolution methods have identified several engineered AAVs with enhanced tissue  
263 potency after systemic injection(25), the mechanisms by which engineered AAVs gain their  
264 enhancements are, with a few recent notable exceptions(38, 66), largely unknown. This is  
265 particularly true for engineered AAVs with enhanced potency in the CNS, where PHP.eB, which  
266 was found to use Ly6a in many mouse strains(43–45), stands alone in being de-orphanized. The  
267 strain dependence and murine restriction of PHP.eB's Ly6a interaction accelerated a push toward  
268 NHPs for engineered capsid identification and validation for translational vectors. However,  
269 human gene therapy's increasing embrace of engineered AAV capsids in human clinical trials(36,  
270 37) coupled with the scarcity and costs of NHP(40, 41), highlight the need for higher through-put  
271 methods to validate novel AAVs with diverse, and conserved, mechanisms for crossing the BBB.  
272 By screening a curated pool of 40 candidate receptors selected for the intersection of their CNS

273 expression level and endothelial-cell specificity, we were able to identify Ly6c1 and carbonic  
274 anhydrase IV as molecular receptors for enhanced blood brain barrier crossing of ten Ly6a-  
275 independent engineered AAVs (as well as Ly6a-dependent PHP.N). These findings allow for more  
276 efficient allocation of NHPs, inform future directed evolution library designs, and enable receptor-  
277 guided engineering directly for human protein interaction.

278         Interestingly, neither Ly6c1 nor Car4 had been identified as among the most enriched  
279 proteins in CNS endothelial cells compared to peripheral endothelial cells(67). Given the distinct  
280 capsid sites for peptide insertion and galactose(68) or AAVR interaction(69, 70) and our model  
281 predicting simultaneous AAVR PKD2 and Ly6a interaction, it is likely that the receptors identified  
282 here work in concert with AAV9's endogenous interaction partners to shape each AAV's tropism.

283         While differences in their capsid insertion sequences suggested potentially diverse  
284 mechanisms for crossing the BBB, nine capsids were found to interact with the same receptor,  
285 Ly6c1. Differences in potency between AAVs in mouse strains can be dose-dependent, as we saw  
286 with PHP.N. This suggests that in some cases a cell culture screen can be sensitive to interactions  
287 that might only become functionally relevant *in vivo* at higher doses. Unlike Ly6a, none of the  
288 sequence polymorphisms are predicted to interfere with Ly6c1 GPI anchoring and thus membrane  
289 localization. Ly6c1 expression levels are also consistently high across in-bred mouse strains but  
290 are significantly lower in recently wild-derived mouse strains(71). Together these features suggest  
291 that Ly6c1-utilizing AAVs may be useful research tools across genetically diverse mouse strains.

292         While we confirmed Ly6a interaction for CAP.B10 and CAP.B22, no additional  
293 interactions were identified. Thus, the mechanism by which these capsids (in contrast to  
294 PHP.B/eB) endow enhanced CNS potency in marmoset remains unclear(34). It is possible that  
295 selecting a variable region IV library in the context of the PHP.eB variable region VIII insertion

296 enriched for new receptor interactions outside the most abundant endothelial cell proteins and the  
297 Ly6 family. If a novel receptor can cooperatively enhance BBB crossing with Ly6a, it will enjoy  
298 outsized impact on CNS potency compared to acting alone. Thus, selection strategies promoting  
299 cooperativity may be employed to uncover lower likelihood receptors in mice and promote  
300 mechanistic diversity.

301         That two members of the Ly6 protein superfamily predominate as binding partners in CNS  
302 selections with AAV9 variable region VIII insertion libraries suggests a special complementarity  
303 between this library design and the Ly6 protein fold. This notion is supported by recent work  
304 suggesting additional interaction sites between wild-type AAV9 regions of AAV-PHP.eB and  
305 Ly6a(55). Using our integrative modeling pipeline, we generated a complete, experimentally-  
306 validated receptor complex model for PHP.eB with Ly6a, which has otherwise resisted high-  
307 resolution structural characterization(56). This model illustrates the complementarity of PHP.eB  
308 to Ly6a and predicts additional interactions outside of the insertion peptide. This insight provides  
309 opportunities for improved capsid engineering by both rational design (via *in vitro* selection for  
310 Ly6 family members with desirable expression patterns or conservation across species) and  
311 directed evolution (via negative selection pre-screens against purified Ly6 family proteins to  
312 encourage other BBB-crossing solutions). Our new APPRAISE-AAV *in silico* method is well  
313 suited to such screens. This method is also readily applied to any existing engineered capsid library  
314 dataset to mine for capsid variants likely to interact with a chosen target receptor, including Car4.  
315 Our modeling pipeline also provides high-confidence binding models for AAV receptor complexes  
316 that have proven difficult to structurally resolve. We note that the APPRAISE methodology is not  
317 limited to AAVs, and the pipeline for generating full AAV trimer complex structures may readily



318 be employed to guide the translation of engineered peptide insertions identified through directed  
319 evolution in AAVs to other protein modalities.

320 In addition to the Ly6c1-interacting AAVs, our cell culture screen also identified two  
321 AAVs, 9P31 and 9P36, with pronounced infectivity boosts with carbonic anhydrase IV. Car4, also  
322 a GPI anchored protein, is known to localize to the luminal surface of brain endothelial cells  
323 throughout the cortex and cerebellum where it enzymatically modulates carbon dioxide-  
324 bicarbonate balance(72, 73). While no specific role in BBB crossing has previously been attributed  
325 to Car4, it was recently found to be among the mouse proteins most strongly positively correlated  
326 with plasma-protein uptake in the brain (slightly stronger than the often-targeted transferrin  
327 receptor)(74). This property was hypothesized at the time to be potentially useful for identifying  
328 receptors for enhanced BBB crossing(75). Car4 is also expressed in the GI tract, kidney, and  
329 lung(76, 77), as well as taste receptor cells where it allows us to sense carbonation(78). While  
330 Ly6a expression in the kidney, heart, and liver(79) does not result in increased transduction there  
331 by PHP.B(17), detailed peripheral characterization of 9P31, 9P36, and other Car4-interacting  
332 AAVs will be required to determine potentially enhanced infectivity in Car4-expressing peripheral  
333 tissue.

334 Carbonic anhydrase IV is broadly conserved across vertebrates and has similar CNS  
335 expression profiles in humans(49–51), with recent single cell analyses of human brain vasculature  
336 confirming CA4's expression in the human BBB(80, 81). Thus, CA4-interacting AAVs are  
337 attractive candidates for translation across diverse model organisms and potentially in human gene  
338 therapies. A limitation of the current study, however, is that both 9P31 and 9P36 AAVs display  
339 enhanced potency with mouse Car4 but not rhesus macaque or human CA4. While neither virus  
340 would be expected to translate from mice to these species, we have identified a therapeutic target

341 and mechanism for BBB crossing that may. The potential for specific engineered AAV binding  
342 epitopes to experience genetic drift between even closely related species confronts all products of  
343 directed evolution whose intended final use differs from their selection conditions. This potential  
344 takes on increasing importance when considering the potential for failed trials to preclude patients  
345 from future AAV treatments by eliciting cross-reactive neutralizing antibodies(82–84). Future  
346 rational engineering of new AAVs against species-appropriate CA4, aided by our APPRAISE-  
347 AAV method, is a promising new avenue for the generation of non-invasive vectors with enhanced  
348 CNS potency. Targeting CA4 may also find application across diverse protein and chemical  
349 modalities.

350 In summary, using a convenient cell culture screen, we were able to identify diverse targets  
351 for enhanced BBB crossing by engineered AAV capsids. These include a novel candidate receptor  
352 for potent research tools in mice, Ly6c1, against which we evolved an enhanced capsid, AAV-  
353 PHP.eC, and a novel target that is broadly conserved across species, CA4, against which future  
354 engineered capsids may be designed for confident translation across species, including in humans.  
355 Cautioned by the differential performance of early engineered AAVs evolved in mice in hosts of  
356 different genetic backgrounds (with potentially different BBB compositions), the gene therapy  
357 field has increasingly transitioned to directed evolution in non-human primates to develop AAVs  
358 and other biologics. In addition to being significantly slower and more resource-intensive, the 25-  
359 30 million years of evolutionary divergence between macaques and humans(85, 86) may still prove  
360 a formidable barrier to human therapeutic translation, resulting in non-human primate capsids that  
361 might still fail in humans. Our studies highlight the importance of understanding engineered AAV  
362 mechanisms and demonstrate that high-throughput selections in rodents continue to play an  
363 important role in therapeutic target identification. By de-orphanizing mouse-selected AAVs, we

364 identified carbonic anhydrase IV as a novel target for enhanced BBB receptor-mediated  
365 transcytosis across species, including humans.

## 366 **MATERIALS AND METHODS**

### 367 **Plasmids**

368 AAV capsid variants were subcloned into the pUCmini-iCAP-PHP.B backbone (Addgene ID:  
369 103002). ssAAV genomes employed were pAAV:CAG-mNeonGreen (Addgene ID: 99134) and  
370 pAAV:CAG-2xNLS-EGFP (equivalent version with one NLS: Addgene ID: 104061), as noted in  
371 figures and legends. Receptor candidate plasmids were purchased from GenScript. All selected  
372 ORF clones were introduced to a pcDNA3.1+/C-(K)-DYK backbone, excepting Lynx1 in  
373 pcDNA3.1, which was generously shared by Prof. Julie Miwa (Lehigh). AAV capsid libraries were  
374 amplified from pCRII-9Cap-XE plasmid and subcloned into rAAV- $\Delta$ Cap-in-cis-Lox2 plasmid for  
375 transfection with AAV2/9 REP-AAP- $\Delta$ Cap (library plasmids available upon request from Caltech  
376 CLOVER Center)(22).

### 377 **Animals**

378 All animal procedures were approved by the California Institute of Technology Institutional  
379 Animal Care and Use Committee (IACUC) and comply with all relevant ethical regulations.  
380 C57BL/6J (000664), BALB/cJ (000651), CBA/J (000656), NOD/ShiLtJ (001976), Syn1-Cre  
381 (3966), GFAP-Cre (012886), Tek-Cre (8863), and Olig2-Cre (025567) mouse lines were  
382 purchased from Jackson Laboratory (JAX). Heterozygous Car4 knockout mice (008217) were  
383 cryo-recovered by JAX and bred at Caltech to generate homozygous WT/WT and KO/KO animals.  
384 Six to eight week old mice were intravenously injected with rAAV into the retro-orbital sinus.

385 Mice were randomly assigned to a particular rAAV during testing of transduction phenotypes.  
386 Experimenters were not blinded for any of the experiments performed in this study.

### 387 **AAV vector production**

388 AAV packaging and purification was performed as previously described(31). Briefly, rAAV were  
389 produced by triple transfection of HEK293T cells (ATTC, CRL-3216) using polyethylenimine.  
390 Media was collected at 72 h and 120 h post-transfection and virus was precipitated in 40%  
391 polyethylene glycol in 2.5 M NaCl. This was resuspended and combined with 120 h post-  
392 transfection cell pellets at 37 °C in 500 mM NaCl, 40 mM Tris, 10 mM MgCl<sub>2</sub>, and 100 U mL<sup>-1</sup>  
393 salt-active nuclease (ArcticZymes, 70910-202). The resulting lysate was extracted from an  
394 iodixanol (Cosmo Bio USA, OptiPrep, AXS-1114542) step gradient following ultracentrifugation.  
395 Purified virus was concentrated and buffer exchanged with phosphate buffered saline (PBS) prior  
396 to titer determination by quantitative PCR.

### 397 **AAV vector administration, tissue processing, and imaging**

398 AAV vectors were administered intravenously to adult mice via retro-orbital injection at doses of  
399  $1 \times 10^{11}$  or  $3 \times 10^{11}$  viral genomes (v.g.) as indicated in figures and legends. After three weeks of  
400 expression, mice were anesthetized with Euthasol (pentobarbital sodium and phenytoin sodium  
401 solution, Virbac AH) and transcardially perfused with roughly 50 mL of 0.1 M PBS, pH 7.4, and  
402 then another 50 mL of 4% paraformaldehyde (PFA) in 0.1 M PBS. Organs were then harvested  
403 and post-fixed in 4% PFA overnight at 4 °C before being washed and stored in 0.1M PBS and  
404 0.05% sodium azide at 4 °C. Finally, the brain was cut into 100 um sections on a Leica VT1200  
405 vibratome. Images were acquired with a Zeiss LSM 880 confocal microscope using a Plan-  
406 Apochromat x10 0.45 M27 (working distance, 2.0 mm) objective and processed in Zen Black 2.3  
407 SP1 (Zeiss) and ImageJ software.

## 408 **Single-cell RNA sequencing analyses**

409 Analyses were performed on a pre-existing C57BL/6J cortex single-cell RNA sequencing dataset  
410 with custom-written scripts in Python 3.7.4 using a custom fork off of scVI v0.8.1, and scanpy  
411 v1.6.0 as described previously(46). Briefly, droplets that passed quality control were classified as  
412 ‘neurons’ or ‘non-neurons’ using a trained scANVI cell type classifier, retaining only those cells  
413 above a false discovery rate threshold of 0.05 after correction for multiple comparisons. Non-  
414 neuronal cells were further subtyped using a trained scVI model and clustered based on the learned  
415 latent space using the Leiden algorithm as implemented in scanpy. Endothelial cell clusters were  
416 assigned if they were positive for all marker genes for that cell subtype. Membrane proteins were  
417 filtered by Uniprot keyword ‘cell membrane’ and differential expression scores were calculated in  
418 scanpy.

## 419 **Immunofluorescence**

420 Immunofluorescence experiments were performed on HEK293T cells to label transiently  
421 transfected receptors such as Ly6a (Abcam ab51317, 1:200 dilution), Ly6c1 (Abcam ab15627,  
422 1:200 dilution), and Carbonic Anhydrase IV (Invitrogen PA5-47312, 1:40 dilution). HEK293T cells  
423 were seeded at 80% confluency in 6-well plates and maintained in Dulbecco’s Modified Eagle  
424 Medium (DMEM) supplemented with 5% fetal bovine serum (FBS), 1% non-essential amino acids  
425 (NEAA), and 100 U/mL penicillin-streptomycin at 37°C in 5% CO<sub>2</sub>. Membrane associated  
426 receptor candidates were transfected by polyethylenimine (PolySciences # 23966). Cells were  
427 seeded on Neuvitro Poly-D-lysine coated sterile German glass coverslips (Fisher Scientific  
428 #NC0343705) 24 hours post-transfection in 24-well plates then fixed in 4% paraformaldehyde  
429 once attached. Coverslips were blocked with 1X tris-buffered saline (TBS) containing 3% bovine  
430 serum albumin (BSA) for 30 minutes and incubated in primary antibody in 1x TBS, 3% BSA, and

431 0.05% Triton X-100 for 60 minutes at ambient temperature. Coverslips were washed three times  
432 in 1x TBS then incubated with secondary (Ly6a & Ly6c1: Invitrogen A-21247, 1:1000 dilution;  
433 Car4: Invitrogen A-21432, 1:1000 dilution) in the same medium for 60 minutes. Coverslips were  
434 mounted on slides with Diamond Antifade Mounting Media with DAPI (Invitrogen P36931).  
435 Fluorescent microscopic images were captured on a confocal laser-scanning microscope (LSM  
436 880, Carl Zeiss, USA).

### 437 **Cell culture characterization of rAAV vectors**

438 HEK293T cells were seeded at 80% confluency in 6-well plates and maintained in Dulbecco's  
439 Modified Eagle Medium (DMEM) supplemented with 5% fetal bovine serum (FBS), 1% non-  
440 essential amino acids (NEAA), and 100 U mL<sup>-1</sup> penicillin-streptomycin at 37 °C in 5% CO<sub>2</sub>.  
441 Membrane associated receptor candidates were transiently expressed in HEK293T cells by  
442 transfecting each well with 2.53 µg plasmid DNA. Receptor-expressing cells were transferred to  
443 96-well plates at 20% confluency and maintained in FluoroBrite™ DMEM supplemented with  
444 0.5% FBS, 1% NEAA, 100 U mL<sup>-1</sup> penicillin-streptomycin, 1x GlutaMAX, and 15 µM HEPES  
445 at 37 °C in 5% CO<sub>2</sub>. Cells expressing each receptor candidate were transduced with engineered  
446 AAV variants at 1 x 10<sup>9</sup> v.g. well<sup>-1</sup> and 5 x 10<sup>8</sup> v.g. well<sup>-1</sup> in triplicate. Plates were imaged 24 hours  
447 post-transduction with the Keyence BZ-X700 using the 4x objective and NucBlue™ Live  
448 ReadyProbes™ Reagent (Hoechst 33342) to autofocus each well.

### 449 **Cell culture fluorescence image quantitation**

450 All image processing was performed using our custom Python image processing pipeline, available  
451 at [github.com/GradinaruLab/in\\_vitro\\_transduction\\_assay](https://github.com/GradinaruLab/in_vitro_transduction_assay). In brief, the area of cells is determined  
452 in both brightfield and signal images and the percent of cells transduced and brightness per  
453 transduced area is determined from these images.

454 First, background subtraction is performed on the brightfield images by applying gaussian  
455 blur (`skimage.filters.gaussian`, `sigma = 30`, `truncate = 0.35`) and subtracting the product from the  
456 original brightfield image. In brightfield images, cells are silhouetted by the lamp producing both  
457 bright and dark edges. Histogram based thresholding can be applied to these images to determine  
458 bright and dark regions of the brightfield image, which can be combined to create a mask of cell  
459 edges in the image. Cells can be filled by applying `skimage.morphology.closing`, which runs a  
460 template over the image to fill contiguous regions (`skimage.morphology.disk`, `radius = 2`). The  
461 total area of cells in the brightfield image can then determined by summing all the pixels in the  
462 mask.

463 On the signal images, background subtraction is performed by applying gaussian blur  
464 (`skimage.filters.gaussian`, `sigma = 100`). Subtracting the product of gaussian blur from the original  
465 signal image produces an image with minimal fluctuations in background intensity. Histogram  
466 based thresholding is applied to this image to identify the intensity of background in the brightfield  
467 image and create a mask of bright regions in the image, which is comprised of transduced cells.  
468 Noise can be removed from the mask using `skimage.morphology.remove_small_objects` (`min_size`  
469 `= 5`). From this the total area of transduced cells can be determined by summing all the pixels in  
470 the mask.

471 After performing this segmentation, the percentage of cells transduced can be determined  
472 by taking the ratio of signal area to the total cell area. By multiplying the mask by the original  
473 image and summing all the pixel intensities in the product image, the total brightness of transduced  
474 cells can be determined. This value can then be divided by the total area of transduced cells to  
475 determine the brightness per transduced area.

## 476 **Receptor protein production**

477 Ly6a-Fc was produced in Expi293F suspension cells grown in Expi293 Expression Medium  
478 (Thermo Fisher Scientific) in a 37 °C, 5% CO<sub>2</sub> incubator with 130 rpm shaking. Transfection was  
479 performed with Expifectamine according to manufacturer's instructions (Thermo Fisher  
480 Scientific). Following harvesting of cell conditioned media, 1 M Tris, pH 8.0 was added to a final  
481 concentration of 20 mM. Ni-NTA Agarose (QIAGEN) was added to ~5% conditioned media  
482 volume. 1 M sterile PBS, pH 7.2 (GIBCO) was added to ~3X conditioned media volume. The  
483 mixture was stirred overnight at 4 °C. Ni-NTA agarose beads were collected in a Buchner funnel  
484 and washed with ~300 mL protein wash buffer (30 mM HEPES, pH 7.2, 150 mM NaCl, 20 mM  
485 imidazole). Beads were transferred to an Econo-Pak Chromatography column (Bio-Rad) and  
486 protein was eluted in 15 mL of elution buffer (30 mM HEPES, pH 7.2, 150 mM NaCl, 200 mM  
487 imidazole). Proteins were concentrated using Amicon Ultracel 10K filters (Millipore) and  
488 absorbance at 280 nm was measured using a Nanodrop 2000 spectrophotometer (Thermo Fisher  
489 Scientific) to determine protein concentration.

#### 490 **Surface plasmon resonance**

491 Surface plasmon resonance (SPR) was performed using a Sierra SPR-32 (Bruker). Ly6a-Fc fusion  
492 protein in HBS-P+ buffer (GE Healthcare) was immobilized to a protein A sensor chip at a capture  
493 level of approximately 1200-1500 response units (RUs). Two-fold dilutions of rAAVs beginning  
494 at  $2 \times 10^{12}$  v.g. mL<sup>-1</sup> were injected at a flow rate of 10  $\mu$ l min<sup>-1</sup> with a contact time of 240 s and a  
495 dissociation time of 600 s. After each cycle, the protein A sensor chip was regenerated with 10  
496 mM glycine pH 1.5. Kinetic data were double reference subtracted.

#### 497 **Automated Pairwise Peptide Receptor Analysis for Screening Engineered AAVs** 498 **(APPRAISE-AAV)**



499 FASTA-format files containing a target receptor amino acid sequence (mature protein part only)  
500 as well as peptide sequences corresponding to amino acids 587 through 594 (wild-type AAV9 VP1  
501 indices) from two AAV capsids of interest were used for structural prediction using a batch version  
502 of ColabFold(87) (alphafold-colabfold 2.1.14), a cloud-based implementation of multiple  
503 sequence alignment(88–90), and AlphaFold2 Multimer(52). The ColabFold Jupyter notebook was  
504 run on a Google Colaboratory session using GPU (NVIDIA Tesla V100 SXM2 16GB; we found  
505 that the same model of the GPU yielded the most consistent results). We chose alphafold2-  
506 multimer-v2 as the default AlphaFold version unless otherwise specified. Each model was recycled  
507 three times, and ten models were generated from each competition. Models were quantified with  
508 PyMol (version 2.3.3) using a custom script to count the total number of atoms in the interface  
509 ( $N_{contact}^{POI}$ , defined by a distance cutoff of 5 angstroms (Å)), the total number of atoms in the peptide  
510 that are clashing with the receptor ( $N_{clash}^{POI}$ , defined by a distance cutoff of 1 Å), the binding angle  
511 of the peptide ( $\theta$ , defined as the angle between the vector from receptor gravity center to receptor  
512 anchor and the vector from receptor gravity center to peptide gravity center), and the binding  
513 depths (d, defined as the difference of the distance between the closest point on the peptide to the  
514 receptor center and the minor radius of the ellipsoid hull of the receptor normalized by the minor  
515 radius) of the peptide in each putative peptide-receptor complex model. The minor radii of the  
516 ellipsoid hulls of receptors were measured using HullRad 8.1 89 (Ly6a: 13.4 Å, Ly6c1: 12.7 Å,  
517 mouse Car4: 23.0 Å). Finally, the metric  $\Delta B^{POI,competitor}$  for ranking the propensity of receptor  
518 binding was calculated by subtracting the total binding score of the peptide of interest by the  
519 counterpart score of the competing peptide:

$$\begin{aligned} \Delta B^{POI,competitor} &= B^{POI} - B^{competitor} \\ &= \max(B_{energetic}^{POI} + B_{angle}^{POI} + B_{depth}^{POI}, 0) \\ &\quad - \max(B_{energetic}^{competitor} + B_{angle}^{competitor} + B_{depth}^{competitor}, 0) \end{aligned}$$

520

521 , where the individual terms are defined as follows:

$$522 \quad B_{energetic}^{peptide} = \max(N_{contact}^{peptide} - 10^3 \cdot N_{clash}^{peptide}, 0)$$

$$523 \quad B_{energetic}^{peptide} = \max(N_{contact}^{peptide} - 10^3 \cdot N_{clash}^{peptide}, 0)$$

$$524 \quad B_{depth}^{peptide} = 10^2 \cdot d^3$$

525 The mean number of this metric across replicates was used to form a matrix and plot a heatmap.  
526 Peptides in the heatmap were ranked by the total number of competitions each peptide won minus  
527 the total number of competitions it lost (competitions with  $\Delta B^{POI,competitor}$ ) scores that have p-  
528 values greater than 0.05 in the one-sample Student's t-test were excluded).

### 529 **Computational structure modeling of receptor-AAV complexes**

530 Peptide-receptor structures were modeled using a similar procedure as described in the  
531 APPRAISE-AAV section but with only one single peptide of interest in the input file to achieve  
532 higher accuracy.

533 AAV trimer-receptor complex models were produced using an integrative structure  
534 modeling method (Fig. S5a). Trimers at the AAV three-fold symmetry interface were chosen as  
535 the minimal complete binding interface with a putative receptor that might recapitulate the entire  
536 viral particle while optimizing computational efficiency. First, a peptide-receptor model was  
537 generated by modeling the 15-mer peptide sequence between the residues 587 and 594 (both in  
538 wild-type AAV9 VP1 indices) from the AAV variant of interest in complex with the target receptor  
539 as described above. Then, a trimer model of the AAV variant of interest was modeled using  
540 AlphaFold2 Multimer. The two residues with the highest confidence score (pLDDT score) in the  
541 15-mer peptide of the peptide-receptor model, Pro5' and Phe6', were structurally aligned to the  
542 corresponding residues on the first chain of the trimer model. A coarse combined model was then

543 generated by combining the receptor and the two high-confidence AAV residues from the peptide  
544 receptor model with the remaining AAV residues from the trimer model. The two loops between  
545 Pro5' and Phe6' and the high-confidence AAV9 backbone in the coarse combined model  
546 (corresponding to residues 588-(588+)4' and residues (588+)7'-590, respectively) were then  
547 individually remodeled using RosettaRemodel(58) from the Rosetta software bundle (release  
548 2018.48.60516). Finally, these remodeled loops were merged to generate a final model. The  
549 pLDDT scores for each residue from the original AlphaFold2 outputs were used to color images  
550 of the final model.

#### 551 **M-CREATE selections for PHP.eC**

552 AAV capsid libraries were produced, administered, and recovered post-selection in vivo for next  
553 generation sequencing as described previously(22). Briefly, an initial library was generated by  
554 pooling three amino acid NNK substitutions that scan from AAV9 587 through the 7mer insertion  
555 to AAV9 position 590 of AAV-PHP.C1, C2, C3, and C4 (Fig. 4a). A custom-designed synthetic  
556 round 2 library containing degenerate codon duplicates of 5515 capsid variants identified from the  
557 round 1 library post-selection and spike-in controls was synthesized in an equimolar ratio by Twist  
558 Biosciences. To prevent capsid mosaicism, only 10 ng of assembled library was transfected per  
559 150 mm dish of 293T producer cells and assembled capsids were purified at 60 h post transfection.  
560 Round 1 library was retro-orbitally injected at  $5 \times 10^{10}$  v.g. per mouse in Syn-Cre mice, while  
561 round 2 library was retro-orbitally injected at  $5 \times 10^{11}$  v.g. per mouse in Syn-Cre, GFAP-Cre, Tek-  
562 Cre, Olig2-Cre, wild-type C57BL/6J, and wild-type BALB/cJ mice.

563 Two weeks post-injection, mice were euthanized and all organs including brain were  
564 collected, snap frozen on dry ice, and stored at -80 °C. Frozen tissue was homogenized using  
565 Beadbug homogenizers (Homogenizers, Benchmark Scientific, D1032-15, D1032-30, D1033-28)

566 and rAAV genomes were Trizol extracted. Purified rAAV DNA (Zymo DNA Clean and  
567 Concentrator Kit D4033) was amplified by PCR using Cre-dependent primers, adding flow cell  
568 adaptors around the diversified region for next generation sequencing. NGS data was aligned and  
569 processed as described previously to extract round 1 variant sequence counts and round 2 variant  
570 enrichment scores.

## References

1. W. A. Banks, From blood–brain barrier to blood–brain interface: new opportunities for CNS drug delivery. *Nat Rev Drug Discov* **15**, 275–292 (2016).
2. M. D. Sweeney, Z. Zhao, A. Montagne, A. R. Nelson, B. V. Zlokovic, Blood-Brain Barrier: From Physiology to Disease and Back. *Physiological Reviews* **99**, 21–78 (2019).
3. Z. Zhao, B. V. Zlokovic, Therapeutic TVs for Crossing Barriers in the Brain. *Cell* **182**, 267–269 (2020).
4. C. P. Profaci, R. N. Munji, R. S. Pulido, R. Daneman, The blood–brain barrier in health and disease: Important unanswered questions. *Journal of Experimental Medicine* **217**, e20190062 (2020).
5. J. O. Szablowski, A. Bar-Zion, M. G. Shapiro, Achieving Spatial and Molecular Specificity with Ultrasound-Targeted Biomolecular Nanotherapeutics. *Acc. Chem. Res.* **52**, 2427–2434 (2019).
6. R. J. Watts, M. S. Dennis, Bispecific antibodies for delivery into the brain. *Current Opinion in Chemical Biology* **17**, 393–399 (2013).
7. V. M. Pulgar, Transcytosis to Cross the Blood Brain Barrier, New Advancements and Challenges. *Front. Neurosci.* **12**, 1019 (2019).
8. P. M. Friden, L. R. Walus, G. F. Musso, M. A. Taylor, B. Malfroy, R. M. Starzyk, Anti-transferrin receptor antibody and antibody-drug conjugates cross the blood-brain barrier. *Proc. Natl. Acad. Sci. U.S.A.* **88**, 4771–4775 (1991).
9. Y. J. Yu, Y. Zhang, M. Kenrick, K. Hoyte, W. Luk, Y. Lu, J. Atwal, J. M. Elliott, S. Prabhu, R. J. Watts, M. S. Dennis, Boosting Brain Uptake of a Therapeutic Antibody by Reducing Its Affinity for a Transcytosis Target. *Sci. Transl. Med.* **3** (2011), doi:10.1126/scitranslmed.3002230.

10. K. B. Johnsen, A. Burkhart, L. B. Thomsen, T. L. Andresen, T. Moos, Targeting the transferrin receptor for brain drug delivery. *Progress in Neurobiology* **181**, 101665 (2019).
11. T. Logan, M. J. Simon, A. Rana, G. M. Cherf, A. Srivastava, S. S. Davis, R. L. Y. Low, C.-L. Chiu, M. Fang, F. Huang, A. Bhalla, C. Llapashtica, R. Prorok, M. E. Pizzo, M. E. K. Calvert, E. W. Sun, J. Hsiao-Nakamoto, Y. Rajendra, K. W. Lexa, D. B. Srivastava, B. van Lengerich, J. Wang, Y. Robles-Colmenares, D. J. Kim, J. Duque, M. Lenser, T. K. Earr, H. Nguyen, R. Chau, B. Tsogtbaatar, R. Ravi, L. L. Skuja, H. Solanoy, H. J. Rosen, B. F. Boeve, A. L. Boxer, H. W. Heuer, M. S. Dennis, M. S. Kariolis, K. M. Monroe, L. Przybyla, P. E. Sanchez, R. Meisner, D. Diaz, K. R. Henne, R. J. Watts, A. G. Henry, K. Gunasekaran, G. Astarita, J. H. Suh, J. W. Lewcock, S. L. DeVos, G. Di Paolo, Rescue of a lysosomal storage disorder caused by Grn loss of function with a brain penetrant progranulin biologic. *Cell* **184**, 4651-4668.e25 (2021).
12. G. C. Terstappen, A. H. Meyer, R. D. Bell, W. Zhang, Strategies for delivering therapeutics across the blood–brain barrier. *Nat Rev Drug Discov* **20**, 362–383 (2021).
13. C.-F. Cho, J. M. Wolfe, C. M. Fadzen, D. Calligaris, K. Hornburg, E. A. Chiocca, N. Y. R. Agar, B. L. Pentelute, S. E. Lawler, Blood-brain-barrier spheroids as an in vitro screening platform for brain-penetrating agents. *Nat Commun* **8**, 15623 (2017).
14. S. Bergmann, S. E. Lawler, Y. Qu, C. M. Fadzen, J. M. Wolfe, M. S. Regan, B. L. Pentelute, N. Y. R. Agar, C.-F. Cho, Blood–brain-barrier organoids for investigating the permeability of CNS therapeutics. *Nat Protoc* **13**, 2827–2843 (2018).
15. P. A. Romero, F. H. Arnold, Exploring protein fitness landscapes by directed evolution. *Nat Rev Mol Cell Biol* **10**, 866–876 (2009).
16. S. R. Choudhury, Z. Fitzpatrick, A. F. Harris, S. A. Maitland, J. S. Ferreira, Y. Zhang, S. Ma, R. B. Sharma, H. L. Gray-Edwards, J. A. Johnson, A. K. Johnson, L. C. Alonso, C. Punzo, K. R. Wagner, C. A. Maguire, R. M. Kotin, D. R. Martin, M. Sena-Esteves, In Vivo Selection Yields AAV-B1 Capsid for Central Nervous System and Muscle Gene Therapy. *Molecular Therapy* **24**, 1247–1257 (2016).
17. B. E. Deverman, P. L. Pravdo, B. P. Simpson, S. R. Kumar, K. Y. Chan, A. Banerjee, W.-L. Wu, B. Yang, N. Huber, S. P. Pasca, V. Gradinaru, Cre-dependent selection yields AAV variants for widespread gene transfer to the adult brain. *Nat Biotechnol* **34**, 204–209 (2016).
18. D. S. Ojala, S. Sun, J. L. Santiago-Ortiz, M. G. Shapiro, P. A. Romero, D. V. Schaffer, In Vivo Selection of a Computationally Designed SCHEMA AAV Library Yields a Novel Variant for Infection of Adult Neural Stem Cells in the SVZ. *Molecular Therapy* **26**, 304–319 (2018).
19. E. Hudry, E. Andres-Mateos, E. P. Lerner, A. Volak, O. Cohen, B. T. Hyman, C. A. Maguire, L. H. Vandenberghe, Efficient Gene Transfer to the Central Nervous System by Single-Stranded Anc80L65. *Mol Ther Methods Clin Dev* **10**, 197–209 (2018).
20. K. S. Hanlon, J. C. Meltzer, T. Buzhdygan, M. J. Cheng, M. Sena-Esteves, R. E. Bennett, T. P. Sullivan, R. Razmpour, Y. Gong, C. Ng, J. Nammour, D. Maiz, S. Dujardin, S. H. Ramirez, E.

- Hudry, C. A. Maguire, Selection of an Efficient AAV Vector for Robust CNS Transgene Expression. *Mol Ther Methods Clin Dev* **15**, 320–332 (2019).
21. M. Davidsson, G. Wang, P. Aldrin-Kirk, T. Cardoso, S. Nolbrant, M. Hartnor, J. Mudannayake, M. Parmar, T. Björklund, A systematic capsid evolution approach performed in vivo for the design of AAV vectors with tailored properties and tropism. *Proc Natl Acad Sci U S A* (2019), doi:10.1073/pnas.1910061116.
22. S. Ravindra Kumar, T. F. Miles, X. Chen, D. Brown, T. Dobрева, Q. Huang, X. Ding, Y. Luo, P. H. Einarsson, A. Greenbaum, M. J. Jang, B. E. Deverman, V. Gradinaru, Multiplexed Cre-dependent selection yields systemic AAVs for targeting distinct brain cell types. *Nat Methods* **17**, 541–550 (2020).
23. J. Weinmann, S. Weis, J. Sippel, W. Tulalamba, A. Remes, J. El Andari, A.-K. Herrmann, Q. H. Pham, C. Borowski, S. Hille, T. Schönberger, N. Frey, M. Lenter, T. VandenDriessche, O. J. Müller, M. K. Chuah, T. Lamla, D. Grimm, Identification of a myotropic AAV by massively parallel in vivo evaluation of barcoded capsid variants. *Nat Commun* **11**, 5432 (2020).
24. M. Nonnenmacher, W. Wang, M. A. Child, X.-Q. Ren, C. Huang, A. Z. Ren, J. Tocci, Q. Chen, K. Bittner, K. Tyson, N. Pande, C. H.-Y. Chung, S. M. Paul, J. Hou, Rapid evolution of blood-brain-barrier-penetrating AAV capsids by RNA-driven biopanning. *Mol Ther Methods Clin Dev* **20**, 366–378 (2021).
25. R. C. Challis, S. Ravindra Kumar, X. Chen, D. Goertsen, G. M. Coughlin, A. M. Hori, M. R. Chuapoco, T. S. Otis, T. F. Miles, V. Gradinaru, Adeno-Associated Virus Toolkit to Target Diverse Brain Cells. *Annu. Rev. Neurosci.* **45**, annurev-neuro-111020-100834 (2022).
26. K. Y. Chan, M. J. Jang, B. B. Yoo, A. Greenbaum, N. Ravi, W.-L. Wu, L. Sánchez-Guardado, C. Lois, S. K. Mazmanian, B. E. Deverman, V. Gradinaru, Engineered AAVs for efficient noninvasive gene delivery to the central and peripheral nervous systems. *Nat Neurosci* **20**, 1172–1179 (2017).
27. G. Gao, L. H. Vandenberghe, M. R. Alvira, Y. Lu, R. Calcedo, X. Zhou, J. M. Wilson, Clades of Adeno-associated viruses are widely disseminated in human tissues. *J Virol* **78**, 6381–6388 (2004).
28. K. D. Foust, E. Nurre, C. L. Montgomery, A. Hernandez, C. M. Chan, B. K. Kaspar, Intravascular AAV9 preferentially targets neonatal neurons and adult astrocytes. *Nat Biotechnol* **27**, 59–65 (2009).
29. J. Hordeaux, Q. Wang, N. Katz, E. L. Buza, P. Bell, J. M. Wilson, The Neurotropic Properties of AAV-PHP.B Are Limited to C57BL/6J Mice. *Molecular Therapy* **26**, 664–668 (2018).
30. Y. Matsuzaki, M. Tanaka, S. Hakoda, T. Masuda, R. Miyata, A. Konno, H. Hirai, Neurotropic Properties of AAV-PHP.B Are Shared among Diverse Inbred Strains of Mice. *Molecular Therapy* **27**, 700–704 (2019).

31. R. C. Challis, S. Ravindra Kumar, K. Y. Chan, C. Challis, K. Beadle, M. J. Jang, H. M. Kim, P. S. Rajendran, J. D. Tompkins, K. Shivkumar, B. E. Deverman, V. Gradinaru, Systemic AAV vectors for widespread and targeted gene delivery in rodents. *Nat Protoc* **14**, 379–414 (2019).
32. W. A. Liguore, J. S. Domire, D. Button, Y. Wang, B. D. Dufour, S. Srinivasan, J. L. McBride, AAV-PHP.B Administration Results in a Differential Pattern of CNS Biodistribution in Non-human Primates Compared with Mice. *Molecular Therapy* **27**, 2018–2037 (2019).
33. Y. Matsuzaki, A. Konno, R. Mochizuki, Y. Shinohara, K. Nitta, Y. Okada, H. Hirai, Intravenous administration of the adeno-associated virus-PHP.B capsid fails to upregulate transduction efficiency in the marmoset brain. *Neuroscience Letters* **665**, 182–188 (2018).
34. D. Goertsen, N. C. Flytzanis, N. Goeden, M. R. Chuapoco, A. Cummins, Y. Chen, Y. Fan, Q. Zhang, J. Sharma, Y. Duan, L. Wang, G. Feng, Y. Chen, N. Y. Ip, J. Pickel, V. Gradinaru, AAV capsid variants with brain-wide transgene expression and decreased liver targeting after intravenous delivery in mouse and marmoset. *Nat Neurosci* **25**, 106–115 (2022).
35. R. J. Samulski, N. Muzyczka, AAV-Mediated Gene Therapy for Research and Therapeutic Purposes. *Annu. Rev. Virol.* **1**, 427–451 (2014).
36. D. A. Kuzmin, M. V. Shutova, N. R. Johnston, O. P. Smith, V. V. Fedorin, Y. S. Kukushkin, J. C. M. van der Loo, E. C. Johnstone, The clinical landscape for AAV gene therapies. *Nat Rev Drug Discov* , d41573-021-00017–7 (2021).
37. T. Burdett, S. Nuseibeh, Changing trends in the development of AAV-based gene therapies: a meta-analysis of past and present therapies. *Gene Ther* (2022), doi:10.1038/s41434-022-00363-0.
38. M. Tabebordbar, K. A. Lagerborg, A. Stanton, E. M. King, S. Ye, L. Tellez, A. Krunnusz, S. Tavakoli, J. J. Widrick, K. A. Messemer, E. C. Troiano, B. Moghadaszadeh, B. L. Peacker, K. A. Leacock, N. Horwitz, A. H. Beggs, A. J. Wagers, P. C. Sabeti, Directed evolution of a family of AAV capsid variants enabling potent muscle-directed gene delivery across species. *Cell* **184**, 4919-4938.e22 (2021).
39. X. Chen, S. Ravindra Kumar, C. D. Adams, D. Yang, T. Wang, D. A. Wolfe, C. M. Arokiaraj, V. Ngo, L. J. Campos, J. A. Griffiths, T. Ichiki, S. K. Mazmanian, P. B. Osborne, J. R. Keast, C. T. Miller, A. S. Fox, I. M. Chiu, V. Gradinaru, Engineered AAVs for non-invasive gene delivery to rodent and non-human primate nervous systems. *Neuron* **110**, 2242-2257.e6 (2022).
40. C. Tian, China is facing serious experimental monkey shortage during the COVID-19 lockdown. *J Med Primatol* **50**, 225–227 (2021).
41. N. Subbaraman, The US is boosting funding for research monkeys in the wake of COVID. *Nature* **595**, 633–634 (2021).
42. J. Jumper, R. Evans, A. Pritzel, T. Green, M. Figurnov, O. Ronneberger, K. Tunyasuvunakool, R. Bates, A. Žídek, A. Potapenko, A. Bridgland, C. Meyer, S. A. A. Kohl, A.

- J. Ballard, A. Cowie, B. Romera-Paredes, S. Nikolov, R. Jain, J. Adler, T. Back, S. Petersen, D. Reiman, E. Clancy, M. Zielinski, M. Steinegger, M. Pacholska, T. Berghammer, S. Bodenstein, D. Silver, O. Vinyals, A. W. Senior, K. Kavukcuoglu, P. Kohli, D. Hassabis, Highly accurate protein structure prediction with AlphaFold. *Nature* **596**, 583–589 (2021).
43. J. Hordeaux, Y. Yuan, P. M. Clark, Q. Wang, R. A. Martino, J. J. Sims, P. Bell, A. Raymond, W. L. Stanford, J. M. Wilson, The GPI-Linked Protein LY6A Drives AAV-PHP.B Transport across the Blood-Brain Barrier. *Molecular Therapy* **27**, 912–921 (2019).
44. A. R. Batista, O. D. King, C. P. Reardon, C. Davis, Shankaracharya, V. Philip, H. Gray-Edwards, N. Aronin, C. Lutz, J. Landers, M. Sena-Esteves, *Ly6a* Differential Expression in Blood–Brain Barrier Is Responsible for Strain Specific Central Nervous System Transduction Profile of AAV-PHP.B. *Human Gene Therapy* **31**, 90–102 (2020).
45. Q. Huang, K. Y. Chan, I. G. Tobey, Y. A. Chan, T. Poterba, C. L. Boutros, A. B. Balazs, R. Daneman, J. M. Bloom, C. Seed, B. E. Deverman, G. Di Pasquale, Ed. Delivering genes across the blood-brain barrier: LY6A, a novel cellular receptor for AAV-PHP.B capsids. *PLoS ONE* **14**, e0225206 (2019).
46. D. Brown, M. Altermatt, T. Dobрева, S. Chen, A. Wang, M. Thomson, V. Gradinaru, Deep Parallel Characterization of AAV Tropism and AAV-Mediated Transcriptional Changes via Single-Cell RNA Sequencing. *Front. Immunol.* **12**, 730825 (2021).
47. A. Pierleoni, P. L. Martelli, R. Casadio, PredGPI: a GPI-anchor predictor. *BMC Bioinformatics* **9**, 392 (2008).
48. M. Shmerling, M. Chalik, N. I. Smorodinsky, A. Meeker, S. Roy, O. Sagi-Assif, T. Meshel, A. Danilevsky, N. Shomron, S. Levinger, B. Nishry, D. Baruchi, A. Shargorodsky, R. Ziv, A. Sarusi-Portuguez, M. Lahav, M. Ehrlich, B. Braschi, E. Bruford, I. P. Witz, D. H. Wreschner, *LY6S*, a New IFN-Inducible Human Member of the *Ly6a* Subfamily Expressed by Spleen Cells and Associated with Inflammation and Viral Resistance. *IH* **6**, 253–272 (2022).
49. M. E. E. Tolvanen, C. Ortutay, H. R. Barker, A. Aspatwar, M. Patrikainen, S. Parkkila, Analysis of evolution of carbonic anhydrases IV and XV reveals a rich history of gene duplications and a new group of isozymes. *Bioorganic & Medicinal Chemistry* **21**, 1503–1510 (2013).
50. A. Waheed, W. S. Sly, in *Carbonic Anhydrase: Mechanism, Regulation, Links to Disease, and Industrial Applications*, Subcellular Biochemistry. S. C. Frost, R. McKenna, Eds. (Springer Netherlands, Dordrecht, 2014), vol. 75, pp. 157–179.
51. N. Le Roy, D. J. Jackson, B. Marie, P. Ramos-Silva, F. Marin, The evolution of metazoan  $\alpha$ -carbonic anhydrases and their roles in calcium carbonate biomineralization. *Front Zool* **11**, 75 (2014).
52. R. Evans, M. O’Neill, A. Pritzel, N. Antropova, A. Senior, T. Green, A. Židek, R. Bates, S. Blackwell, J. Yim, O. Ronneberger, S. Bodenstein, M. Zielinski, A. Bridgland, A. Potapenko, A. Cowie, K. Tunyasuvunakool, R. Jain, E. Clancy, P. Kohli, J. Jumper, D. Hassabis, *Protein*



*complex prediction with AlphaFold-Multimer* (Bioinformatics, 2021); <http://biorxiv.org/lookup/doi/10.1101/2021.10.04.463034>).

53. L. Chang, A. Perez, *AlphaFold encodes the principles to identify high affinity peptide binders* (Biophysics, 2022; <http://biorxiv.org/lookup/doi/10.1101/2022.03.18.484931>).

54. T. Tsaban, J. K. Varga, O. Avraham, Z. Ben-Aharon, A. Khramushin, O. Schueler-Furman, Harnessing protein folding neural networks for peptide–protein docking. *Nat Commun* **13**, 176 (2022).

55. R. A. Martino, E. C. Fluck, J. Murphy, Q. Wang, H. Hoff, R. A. Pumroy, C. Y. Lee, J. J. Sims, S. Roy, V. Y. Moiseenkova-Bell, J. M. Wilson, R. M. Sandri-Goldin, Ed. Context-Specific Function of the Engineered Peptide Domain of PHP.B. *J Virol* **95** (2021), doi:10.1128/JVI.01164-21.

56. G. Xu, R. Zhang, H. Li, K. Yin, X. Ma, Z. Lou, Structural basis for the neurotropic AAV9 and the engineered AAVPHP.eB recognition with cellular receptors. *Molecular Therapy - Methods & Clinical Development* **26**, 52–60 (2022).

57. S. Jang, H. K. Shen, X. Ding, T. F. Miles, V. Gradinaru, Structural basis of receptor usage by the engineered capsid AAV-PHP.eB. *Molecular Therapy - Methods & Clinical Development* **26**, 343–354 (2022).

58. P.-S. Huang, Y.-E. A. Ban, F. Richter, I. Andre, R. Vernon, W. R. Schief, D. Baker, V. N. Uversky, Ed. RosettaRemodel: A Generalized Framework for Flexible Backbone Protein Design. *PLoS ONE* **6**, e24109 (2011).

59. I. Johansson-Åkhe, B. Wallner, Improving peptide-protein docking with AlphaFold-Multimer using forced sampling. *Front. Bioinform.* **2**, 959160 (2022).

60. T. Stams, Y. Chen, D. W. Christianson, P. A. Boriack-Sjodin, J. D. Hurt, P. Laipis, D. N. Silverman, J. Liao, J. A. May, T. Dean, Structures of murine carbonic anhydrase IV and human carbonic anhydrase II complexed with brinzolamide: Molecular basis of isozyme-drug discrimination. *Protein Science* **7**, 556–563 (1998).

61. F. Mincione, A. Scozzafava, C. Supuran, The Development of Topically Acting Carbonic Anhydrase Inhibitors as Antiglaucoma Agents. *CTMC* **7**, 849–854 (2007).

62. C. T. Supuran, A. Scozzafava, A. Casini, Carbonic anhydrase inhibitors. *Med. Res. Rev.* **23**, 146–189 (2003).

63. J. A. Couch, Y. J. Yu, Y. Zhang, J. M. Tarrant, R. N. Fuji, W. J. Meilandt, H. Solanoy, R. K. Tong, K. Hoyte, W. Luk, Y. Lu, K. Gadkar, S. Prabhu, B. A. Ordonia, Q. Nguyen, Y. Lin, Z. Lin, M. Balazs, K. Scarce-Levie, J. A. Ernst, M. S. Dennis, R. J. Watts, Addressing Safety Liabilities of TfR Bispecific Antibodies That Cross the Blood-Brain Barrier. *Sci. Transl. Med.* **5** (2013), doi:10.1126/scitranslmed.3005338.

64. Y. J. Yu, J. K. Atwal, Y. Zhang, R. K. Tong, K. R. Wildsmith, C. Tan, N. Bien-Ly, M. Hersom, J. A. Maloney, W. J. Meilandt, D. Bumbaca, K. Gadkar, K. Hoyte, W. Luk, Y. Lu, J. A. Ernst, K. Searce-Levie, J. A. Couch, M. S. Dennis, R. J. Watts, Therapeutic bispecific antibodies cross the blood-brain barrier in nonhuman primates. *Sci. Transl. Med.* **6** (2014), doi:10.1126/scitranslmed.3009835.
65. M. S. Kariolis, R. C. Wells, J. A. Getz, W. Kwan, C. S. Mahon, R. Tong, D. J. Kim, A. Srivastava, C. Bedard, K. R. Henne, T. Giese, V. A. Assimon, X. Chen, Y. Zhang, H. Solanoy, K. Jenkins, P. E. Sanchez, L. Kane, T. Miyamoto, K. S. Chew, M. E. Pizzo, N. Liang, M. E. K. Calvert, S. L. DeVos, S. Baskaran, S. Hall, Z. K. Sweeney, R. G. Thorne, R. J. Watts, M. S. Dennis, A. P. Silverman, Y. J. Y. Zuchero, Brain delivery of therapeutic proteins using an Fc fragment blood-brain barrier transport vehicle in mice and monkeys. *Sci. Transl. Med.* **12**, eaay1359 (2020).
66. L. P. Havlik, A. Das, M. Mietzsch, D. K. Oh, J. Ark, R. McKenna, M. Agbandje-McKenna, A. Asokan, C. R. Parrish, Ed. Receptor Switching in Newly Evolved Adeno-associated Viruses. *J Virol* **95**, e00587-21 (2021).
67. R. N. Munji, A. L. Soung, G. A. Weiner, F. Sohet, B. D. Semple, A. Trivedi, K. Gimlin, M. Kotoda, M. Korai, S. Aydin, A. Batugal, A. C. Cabangcala, P. G. Schupp, M. C. Oldham, T. Hashimoto, L. J. Noble-Haeusslein, R. Daneman, Profiling the mouse brain endothelial transcriptome in health and disease models reveals a core blood–brain barrier dysfunction module. *Nat Neurosci* **22**, 1892–1902 (2019).
68. J. J. Penzes, P. Chipman, N. Bhattacharya, A. Zeher, R. Huang, R. McKenna, M. Agbandje-McKenna, R. M. Sandri-Goldin, Ed. Adeno-associated Virus 9 Structural Rearrangements Induced by Endosomal Trafficking pH and Glycan Attachment. *J Virol* **95**, e00843-21 (2021).
69. R. Zhang, L. Cao, M. Cui, Z. Sun, M. Hu, R. Zhang, W. Stuart, X. Zhao, Z. Yang, X. Li, Y. Sun, S. Li, W. Ding, Z. Lou, Z. Rao, Adeno-associated virus 2 bound to its cellular receptor AAVR. *Nat Microbiol* **4**, 675–682 (2019).
70. N. L. Meyer, G. Hu, O. Davulcu, Q. Xie, A. J. Noble, C. Yoshioka, D. S. Gingerich, A. Trzynka, L. David, S. M. Stagg, M. S. Chapman, Structure of the gene therapy vector, adeno-associated virus with its cell receptor, AAVR. *eLife* **8**, e44707 (2019).
71. J. Schaffenrath, S.-F. Huang, T. Wyss, M. Delorenzi, A. Keller, Characterization of the blood–brain barrier in genetically diverse laboratory mouse strains. *Fluids Barriers CNS* **18**, 34 (2021).
72. M. S. Ghandour, O. K. Langley, X. L. Zhu, A. Waheed, W. S. Sly, Carbonic anhydrase IV on brain capillary endothelial cells: a marker associated with the blood-brain barrier. *Proceedings of the National Academy of Sciences* **89**, 6823–6827 (1992).
73. N. Agarwal, E. S. Lippmann, E. V. Shusta, Identification and expression profiling of blood–brain barrier membrane proteins. *Journal of Neurochemistry* **112**, 625–635 (2010).

74. A. C. Yang, M. Y. Stevens, M. B. Chen, D. P. Lee, D. Stähli, D. Gate, K. Contrepois, W. Chen, T. Iram, L. Zhang, R. T. Vest, A. Chaney, B. Lehallier, N. Olsson, H. du Bois, R. Hsieh, H. C. Cropper, D. Berdnik, L. Li, E. Y. Wang, G. M. Traber, C. R. Bertozzi, J. Luo, M. P. Snyder, J. E. Elias, S. R. Quake, M. L. James, T. Wyss-Coray, Physiological blood–brain transport is impaired with age by a shift in transcytosis. *Nature* **583**, 425–430 (2020).
75. R. N. Munji, R. Daneman, Unexpected amount of blood-borne protein enters the young brain. *Nature* **583**, 362–363 (2020).
76. X. L. Zhu, W. S. Sly, Carbonic anhydrase IV from human lung. Purification, characterization, and comparison with membrane carbonic anhydrase from human kidney. *J Biol Chem* **265**, 8795–8801 (1990).
77. R. E. Fleming, S. Parkkila, A. K. Parkkila, H. Rajaniemi, A. Waheed, W. S. Sly, Carbonic anhydrase IV expression in rat and human gastrointestinal tract regional, cellular, and subcellular localization. *J. Clin. Invest.* **96**, 2907–2913 (1995).
78. J. Chandrashekar, D. Yarmolinsky, L. von Buchholtz, Y. Oka, W. Sly, N. J. P. Ryba, C. S. Zuker, The taste of carbonation. *Science* **326**, 443–445 (2009).
79. M. van de Rijn, S. Heimfeld, G. J. Spangrude, I. L. Weissman, Mouse hematopoietic stem-cell antigen Sca-1 is a member of the Ly-6 antigen family. *Proc Natl Acad Sci U S A* **86**, 4634–4638 (1989).
80. F. J. Garcia, N. Sun, H. Lee, B. Godlewski, H. Mathys, K. Galani, B. Zhou, X. Jiang, A. P. Ng, J. Mantero, L.-H. Tsai, D. A. Bennett, M. Sahin, M. Kellis, M. Heiman, Single-cell dissection of the human brain vasculature. *Nature* **603**, 893–899 (2022).
81. A. C. Yang, R. T. Vest, F. Kern, D. P. Lee, M. Agam, C. A. Maat, P. M. Losada, M. B. Chen, N. Schaum, N. Khoury, A. Toland, K. Calcuttawala, H. Shin, R. Pálóvics, A. Shin, E. Y. Wang, J. Luo, D. Gate, W. J. Schulz-Schaeffer, P. Chu, J. A. Siegenthaler, M. W. McNerney, A. Keller, T. Wyss-Coray, A human brain vascular atlas reveals diverse mediators of Alzheimer’s risk. *Nature* (2022), doi:10.1038/s41586-021-04369-3.
82. L. Tenenbaum, E. Lehtonen, P. Monahan, Evaluation of Risks Related to the Use of Adeno-Associated Virus-Based Vectors. *CGT* **3**, 545–565 (2003).
83. G. Ronzitti, D.-A. Gross, F. Mingozzi, Human Immune Responses to Adeno-Associated Virus (AAV) Vectors. *Front. Immunol.* **11**, 670 (2020).
84. K. Rapti, D. Grimm, Adeno-Associated Viruses (AAV) and Host Immunity – A Race Between the Hare and the Hedgehog. *Front. Immunol.* **12**, 753467 (2021).
85. J. F. Mitchell, D. A. Leopold, The marmoset monkey as a model for visual neuroscience. *Neuroscience Research* **93**, 20–46 (2015).

86. J. E. Janečka, W. Miller, T. H. Pringle, F. Wiens, A. Zitzmann, K. M. Helgen, M. S. Springer, W. J. Murphy, Molecular and Genomic Data Identify the Closest Living Relative of Primates. *Science* **318**, 792–794 (2007).
87. M. Mirdita, K. Schütze, Y. Moriwaki, L. Heo, S. Ovchinnikov, M. Steinegger, ColabFold: making protein folding accessible to all. *Nat Methods* **19**, 679–682 (2022).
88. M. Mirdita, L. von den Driesch, C. Galiez, M. J. Martin, J. Söding, M. Steinegger, Uniclust databases of clustered and deeply annotated protein sequences and alignments. *Nucleic Acids Res* **45**, D170–D176 (2017).
89. M. Mirdita, M. Steinegger, J. Söding, J. Hancock, Ed. MMseqs2 desktop and local web server app for fast, interactive sequence searches. *Bioinformatics* **35**, 2856–2858 (2019).
90. A. L. Mitchell, A. Almeida, M. Beracochea, M. Boland, J. Burgin, G. Cochrane, M. R. Crusoe, V. Kale, S. C. Potter, L. J. Richardson, E. Sakharova, M. Scheremetjew, A. Korobeynikov, A. Shlemov, O. Kunyavskaya, A. Lapidus, R. D. Finn, MGnify: the microbiome analysis resource in 2020. *Nucleic Acids Research* , gkz1035 (2019).

## Acknowledgments

We thank Catherine Oikonomou for help with manuscript editing, Michael Altermatt for assisting in filtering scRNAseq datasets for membrane proteins, Min Jee Jang for designing RNA sequencing variant barcodes, Damien A. Wolfe for assisting in mouse perfusion and tissue collection, Josette Medicielo for plasmid purification, and Julie Miwa (Lehigh) for sharing a lynx1 expression plasmid. We thank the entire Gradinaru lab and CLOVER center staff for helpful discussion. Figures were created using images from BioRender.com. This work was primarily supported by NIH PIONEER DP1OD025535 (to V.G.) and the Beckman Institute for CLARITY, Optogenetics & Vector Engineering Research (CLOVER) for technology development and dissemination (to T.F.S. and V.G.).

## **Author contributions**

T.F.S. and V.G. conceived the project. T.F.S. and V.G. wrote the manuscript and prepared figures with input from all authors. X.D. and A.W.L. optimized Ly6a-Fc expression protocol and A.W.L. produced Ly6a-Fc protein. T.F.S. and E.E.S. produced AAVs. T.F.S. and J.V. performed SPR experiments. T.F.S. and D.B. analyzed the scRNAseq dataset. T.F.S. and E.E.S. developed and E.E.S. performed the cell culture infectivity assay. D.G. developed and implemented the in vitro transduction quantification and plotting pipeline, performed data analysis, and, with T.F.S., prepared in vitro transduction quantification plots. E.E.S. and M.B. performed immunofluorescence experiments. E.E.S., X.C., and M.B. performed Car4-KO experiments, X.D. performed APPRAISE-AAV and developed computational structural modeling strategies. T.F.S., S.R.K., E.E.S, and X.C. performed and analyzed AAV-PHP.eC selections and tested AAVs in wild type mice. T.F.S. and V.G. supervised and V.G. funded the project.

## **Competing interests**

The California Institute of Technology has filed a provisional patent for this work with T.F.S., X.D., and V.G. listed as inventors. V.G. is a co-founder and board member of Capsida Biotherapeutics, a fully integrated AAV engineering and gene therapy company. The remaining authors declare no competing interests

## **Data and materials availability**

The NGS datasets that are reported in this article will be made available with SRA accession codes listed here prior to final publication. Single-cell RNA sequencing datasets are available at

CaltechDATA ([data.caltech.edu/records/2090](http://data.caltech.edu/records/2090)). Plasmids or viruses not available at Addgene may be requested from the Caltech CLOVER Center ([clover.caltech.edu](http://clover.caltech.edu)). The AAV-PHP.eC sequence will be made available with GenBank accession codes listed here prior to final publication. The code used for M-CREATE data analyses are available on GitHub: <https://github.com/GradinaruLab/mCREATE>. The code used for single-cell RNA sequencing analyses are available through GitHub on a different repository: <https://github.com/GradinaruLab/aavomics>. All in vitro transduction image processing was performed using our custom Python image processing pipeline, available at: <https://github.com/GradinaruLab/in-vitro-transduction-assay>.

## Figures

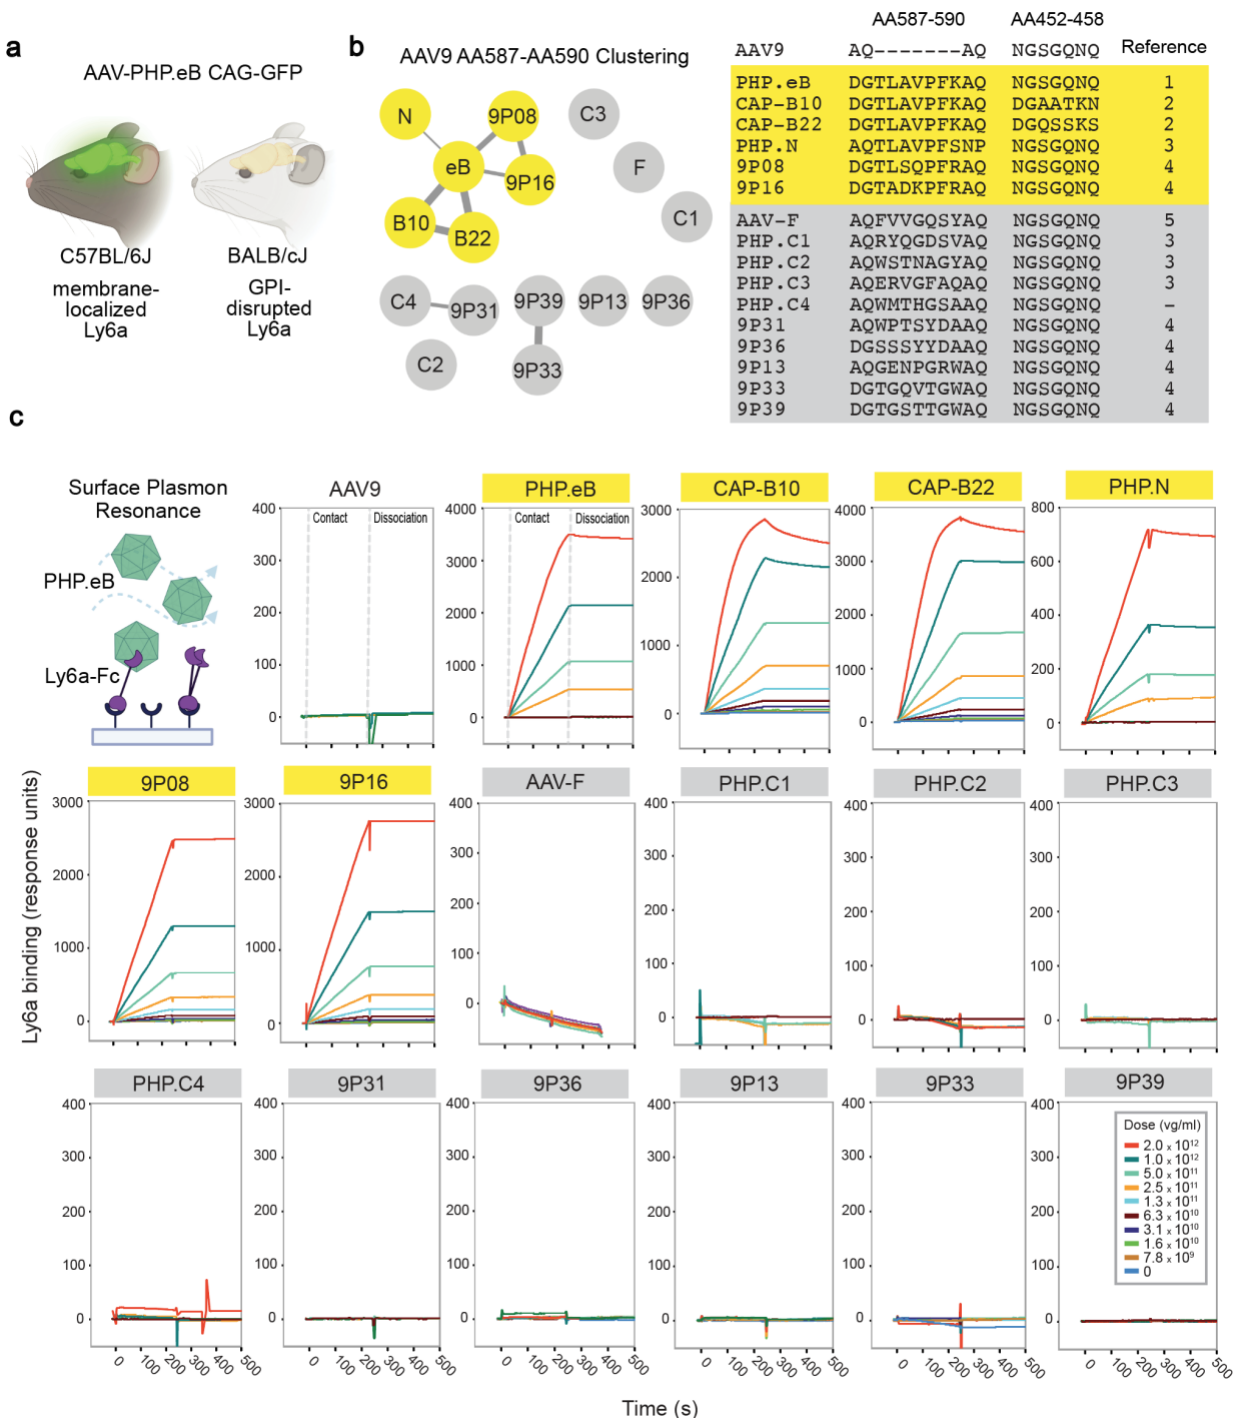

**Fig. 1 Identifying engineered AAVs that do not utilize Ly6a for BBB crossing.** **a**, AAV-PHP.eB can efficiently cross the blood brain barrier using membrane-localized Ly6a in C57BL/6J mice but not GPI-disrupted Ly6a in BALB/cJ mice. **b**, Clustering analysis of CNS-tropic

engineered AAV insertion sequences. Thickness of edges represents degree of relatedness between nodes. AAVs in yellow show a high degree of relatedness to PHP.eB. AAVs in gray show little relation to PHP.eB or each other. The AA sequences inserted between positions 588-589 and 452-458 of the AAV9 capsid for each variant is shown. References: 1: Chan et al. (2017), 2: Goertsen et al. (2022), 3: Ravindra Kumar et al. (2020), 4: Nonnenmacher et al. (2021), 5: Hanlon et al. (2019) **c**, Surface plasmon resonance (SPR) of engineered AAVs binding to Ly6a-Fc captured on a protein A chip. Data are representative of 2 independent experiments.



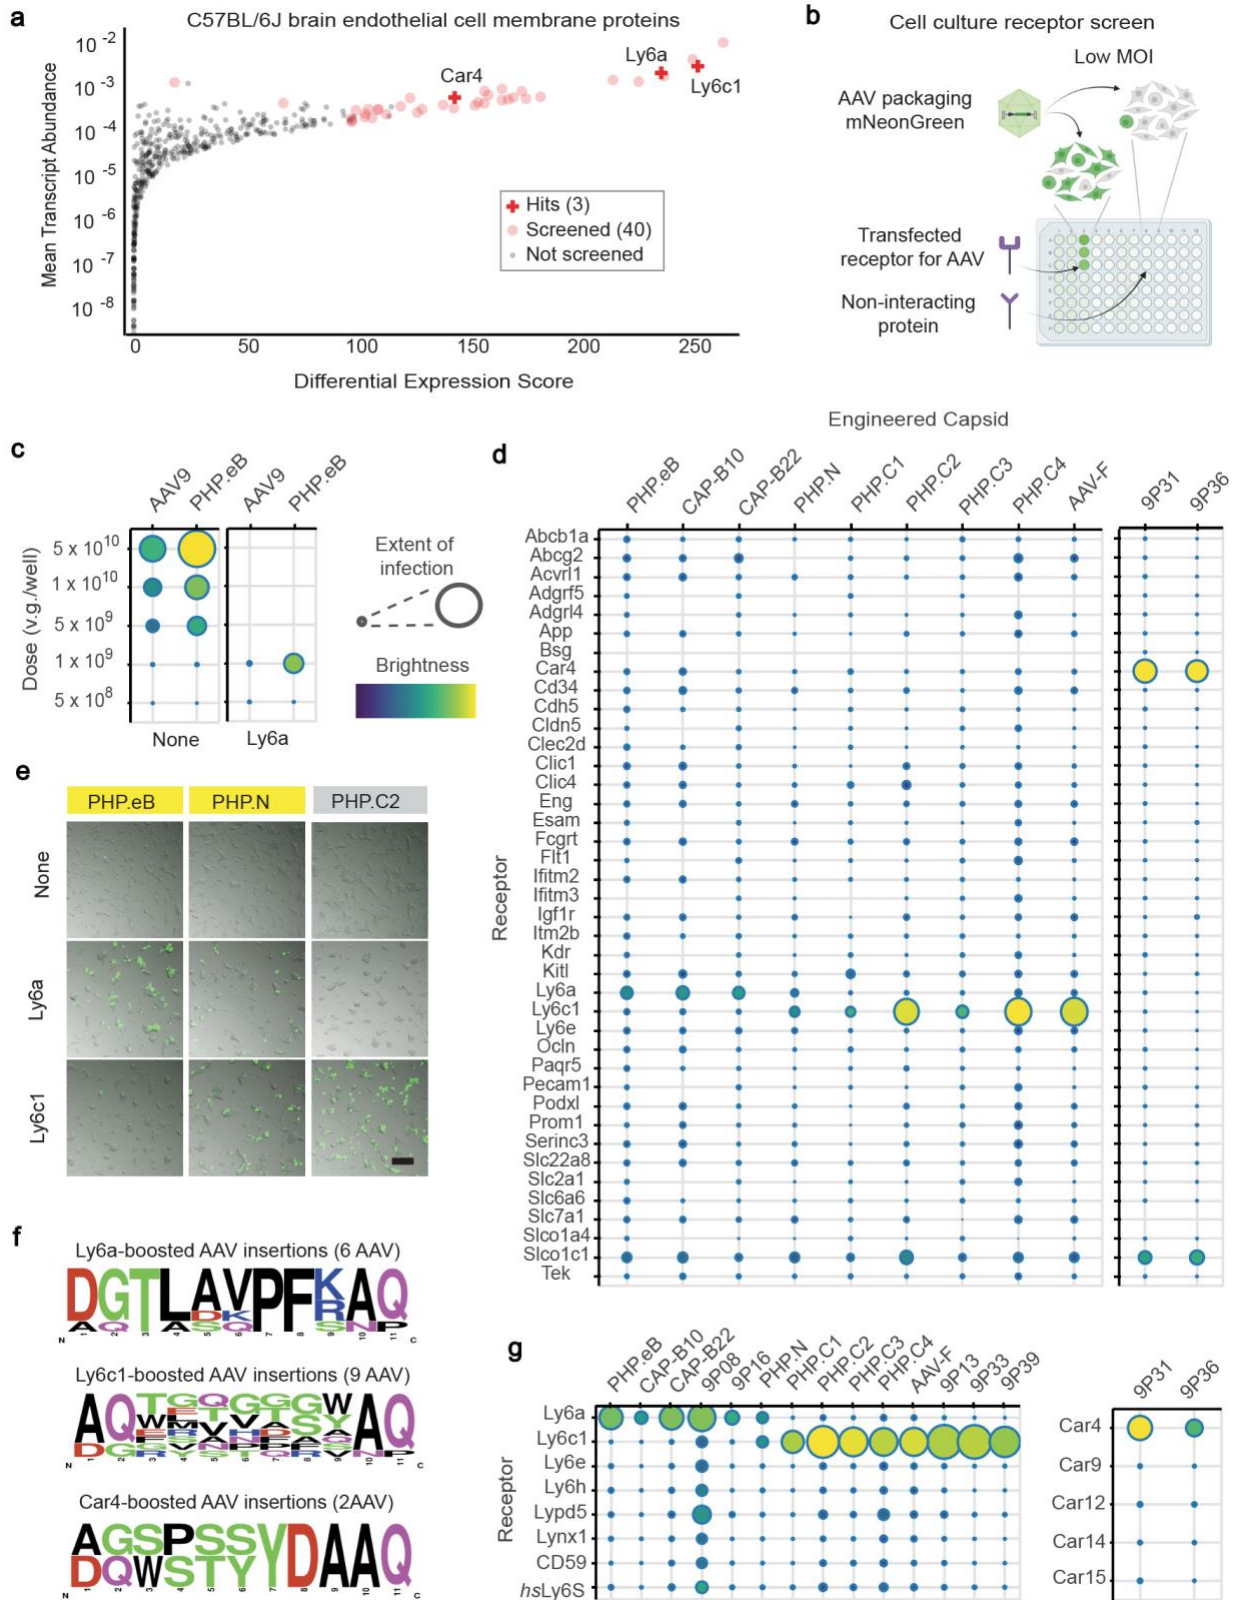

**Fig. 2. Novel receptors enhance infectivity of engineered AAVs *in vitro*.** **a**, Plot of membrane

protein differential expression score in endothelial cells calculated in scanpy versus mean transcript abundance in endothelial cells constructed from single-cell RNA sequencing of C57BL/6J cortex. Proteins selected for cell culture screening are indicated by red circles (see Supplementary Table 1 for full details) and hits are labeled and marked with red crosses. **b**, Potential receptors were screened in cell culture by comparing AAV fluorescent protein transgene levels at low multiplicity of infection (MOI) in mock-transfected cells and cells transfected with each potential receptor. **c**, Dose dependence of AAV9 and PHP.eB packaging CAG-mNeonGreen in HEK293T cells in 96-well plates. At  $1 \times 10^9$  v.g. per well, PHP.eB has markedly higher potency than AAV9 in Ly6a-transfected HEK293T cells. Scales show extent of infection (Max: 0.75, Min: 0.03) and total brightness per signal area (Max: 0.79, Min: 0.39) **d**, Potency of engineered AAVs for HEK293T cells transfected with the potential receptor panel. Extent of infection (*Left*, Max: 0.33, Min: 0.001; *Right*, Max: 0.55, Min: 0.03), Total brightness per signal area (*Left*, Max: 0.55, Min: 0.06; *Right*, Max: 0.61, Min: 0.11) **e**, Representative images of HEK cells cultured in 96 well plates, either mock-transfected (none) or transfected with a potential receptor, infected with  $1 \times 10^9$  v.g. per well of AAVs (yellow label background indicates Ly6a binding) packaging CAG-mNeonGreen and imaged 24 hours post transduction. An overlay of brightfield and fluorescence images is presented. Scale bar = 200  $\mu\text{m}$ . **f**, Amino acid frequencies by position among engineered AAVs found to have infectivity enhancements with Ly6a (6 viruses), Ly6c1 (9 viruses), and Car4 (2 viruses). **g**, Potency of engineered AAVs for HEK293T cells transfected with Ly6 and Car family potential receptors. Extent of infection (*Left*, Max: 0.51, Min: 0.03; *Right*, Max: 0.52, Min: 0.05), Total brightness per signal area (*Left*, Max: 0.75, Min: 0.13; *Right*, Max: 0.79, Min: 0.34).

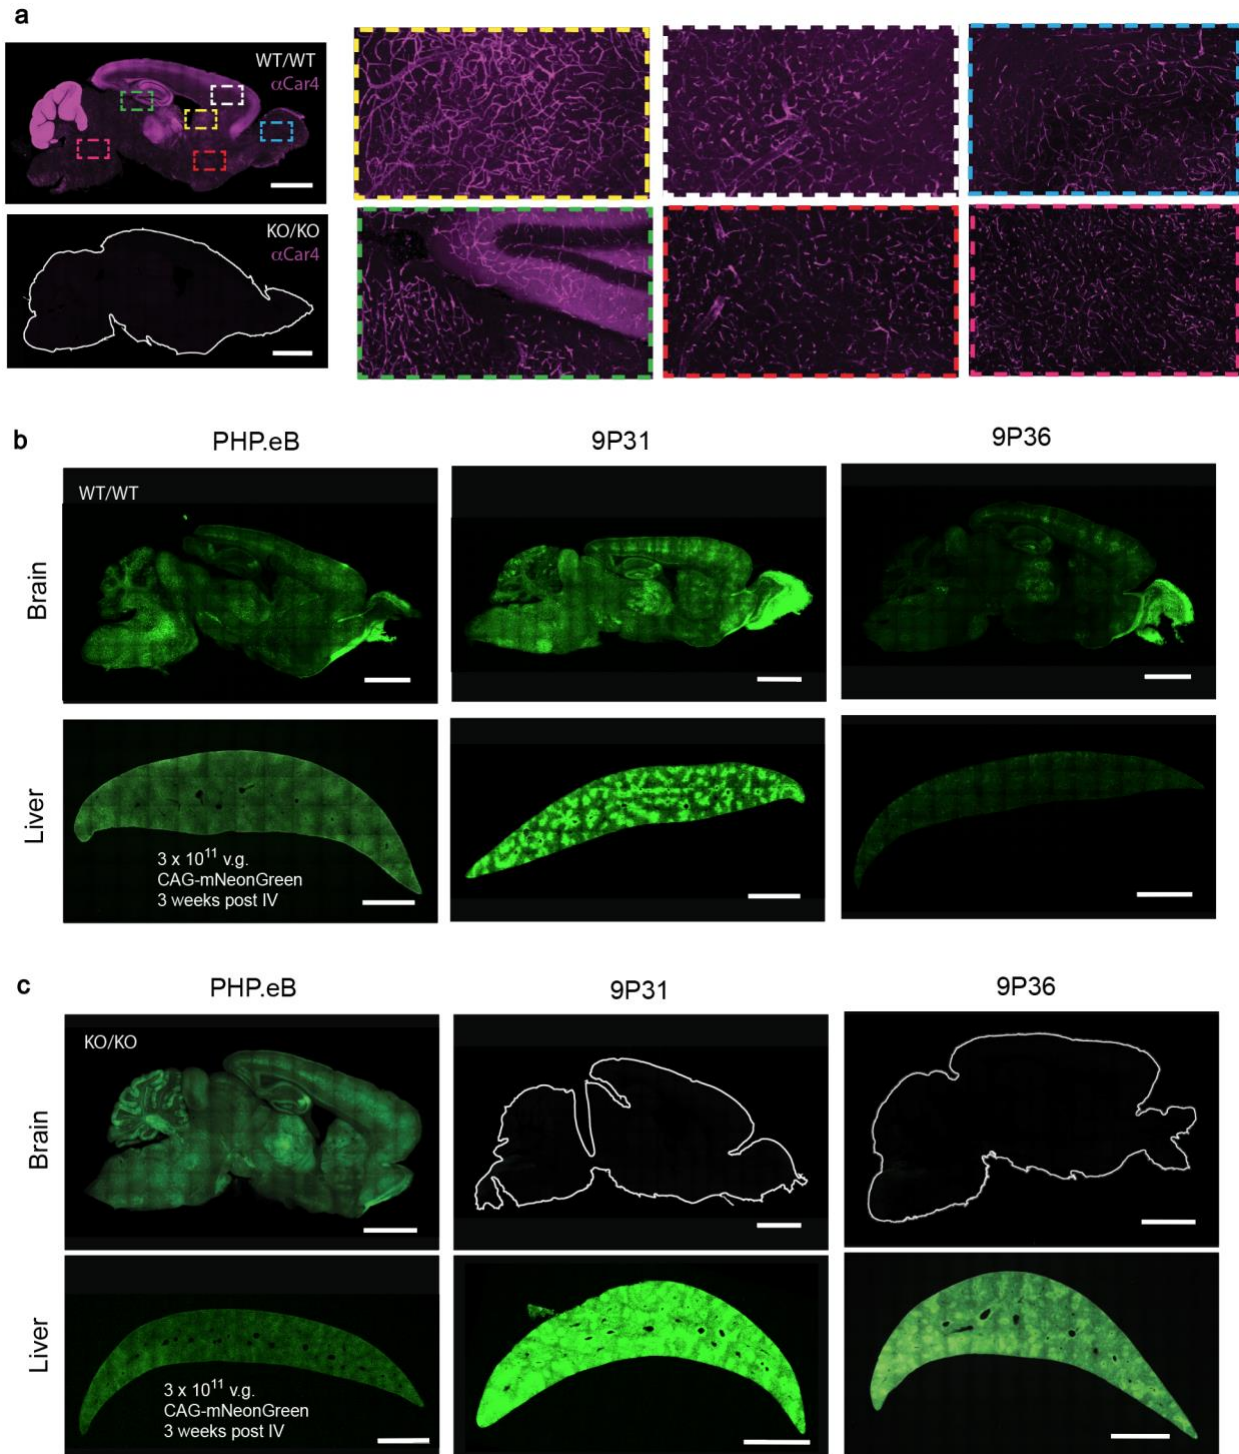

**Fig. 3. Carbonic anhydrase IV is required for the CNS potency of Car4-dependent AAV. a,** Immunostaining for Car4 in the brains of WT/WT and KO/KO Car4 mice. Magnified regions from WT/WT demonstrate endothelial expression across diverse brain regions. **b,** AAV-PHP.eB, 9P31,

and 9P36 packaging mNeonGreen under the control of the ubiquitous CAG promoter were intravenously administered to WT/WT Car4 mice at a dose of  $3 \times 10^{11}$  v.g. per animal (n=3 per condition). Three weeks after administration, transgene expression was assayed by mNeonGreen fluorescence throughout the brain and liver. **c**, AAV-PHP.eB, 9P31, and 9P36 packaging mNeonGreen under the control of the ubiquitous CAG promoter were intravenously administered to KO/KO Car4 mice at a dose of  $3 \times 10^{11}$  v.g. per animal (n=3 per condition). Three weeks after administration, transgene expression was assayed by mNeonGreen fluorescence throughout the brain and liver. Scale bars = 2 mm.

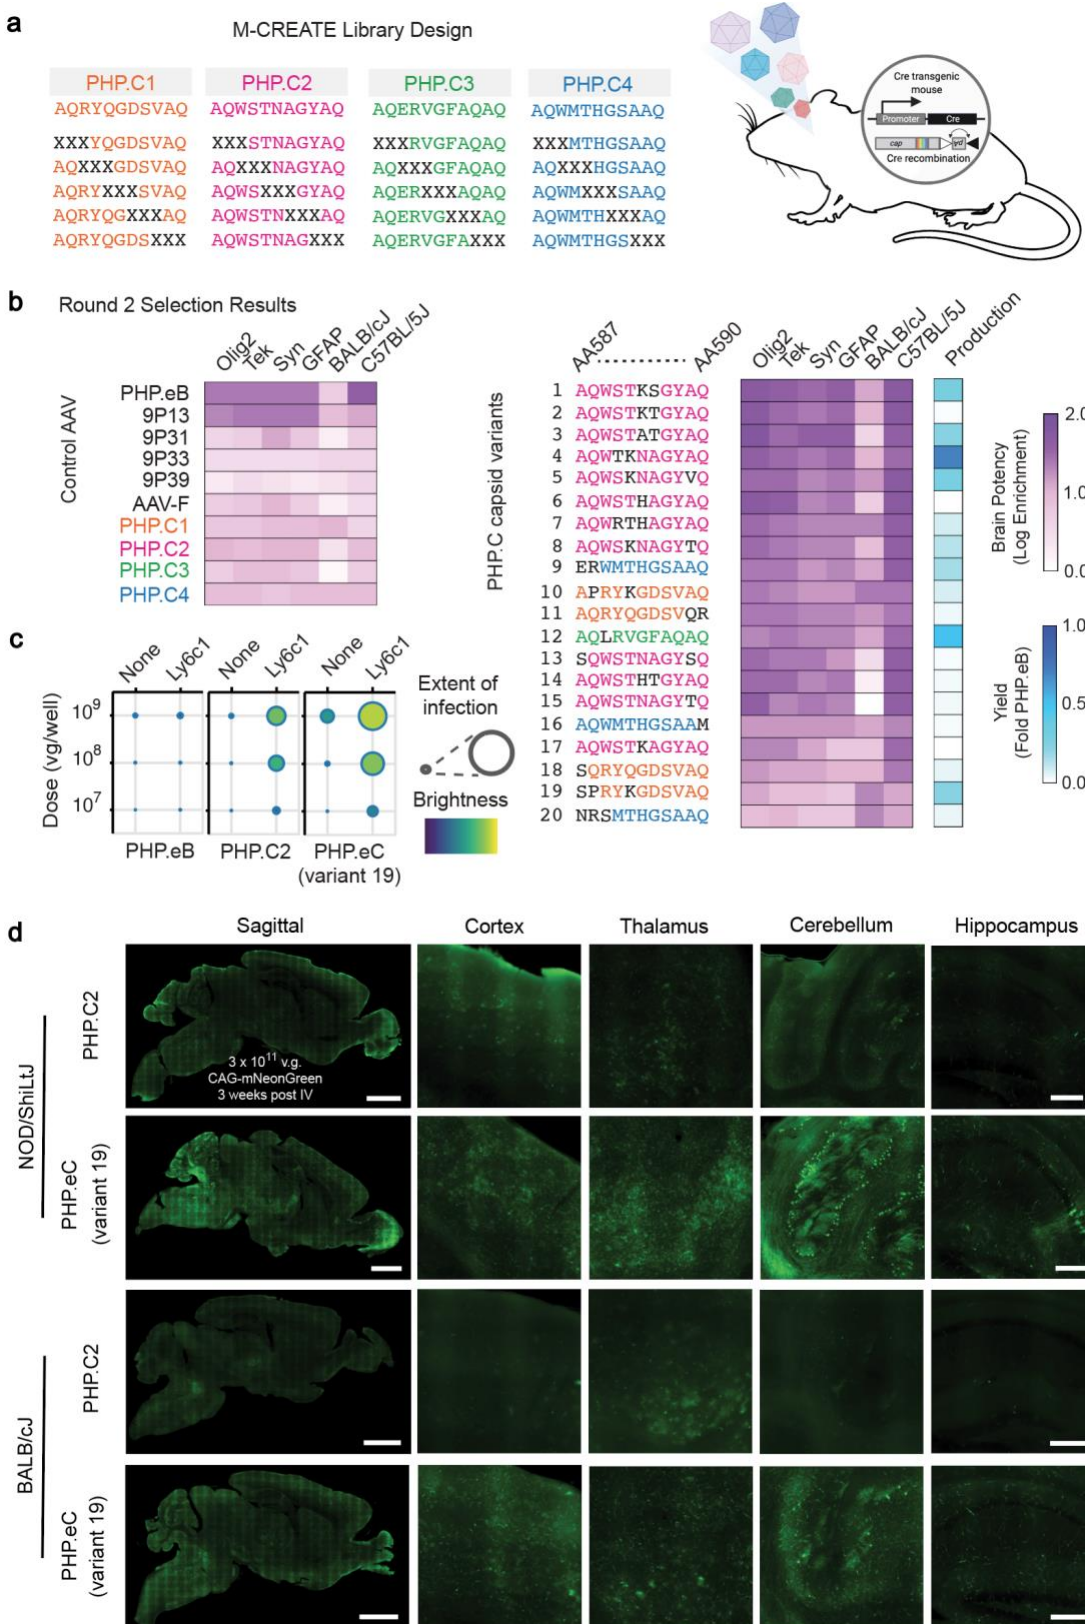

**Fig. 4. Engineering an enhanced Ly6c1-dependent AAV. a**, AAV library design strategy.

Scanning 3-mer libraries of PHP.C1 - C4 were constructed as shown with Xs indicating the position of NNK codons. AAVs were pooled and two rounds of M-CREATE selections were performed in 6-8 week old Cre-transgenic mice. **b**, Round 2 selection brain enrichments for diverse Cre-transgenic and wild-type mice of selected control AAVs and 20 capsid variants selected for further study. Yield was determined during small scale production for final screening across strains. **c**, Potency in cell culture infectivity assay of PHP.eB, PHP.C2, and PHP.eC (variant 19) in HEK293T cells transfected with mock (none) or Ly6c1 receptors, demonstrating that PHP.eC retains Ly6c1 interaction. Extent of infection (Max: 0.93, Min: 0.02), Total brightness per signal area (Max: 0.74, Min: 0.16) **d**, PHP.C2 and PHP.eC packaging mNeonGreen under the control of the ubiquitous CAG promoter were intravenously administered to NOD/ShiLtJ and BALB/cJ mice at a dose of  $3 \times 10^{11}$  v.g. per animal (n=3 per condition). Three weeks after administration, transgene expression was assayed by mNeonGreen fluorescence throughout the brain and liver, demonstrating PHP.eC's increased potency. Sagittal image scale bars = 2 mm. Brain region scale bars = 250  $\mu$ m.

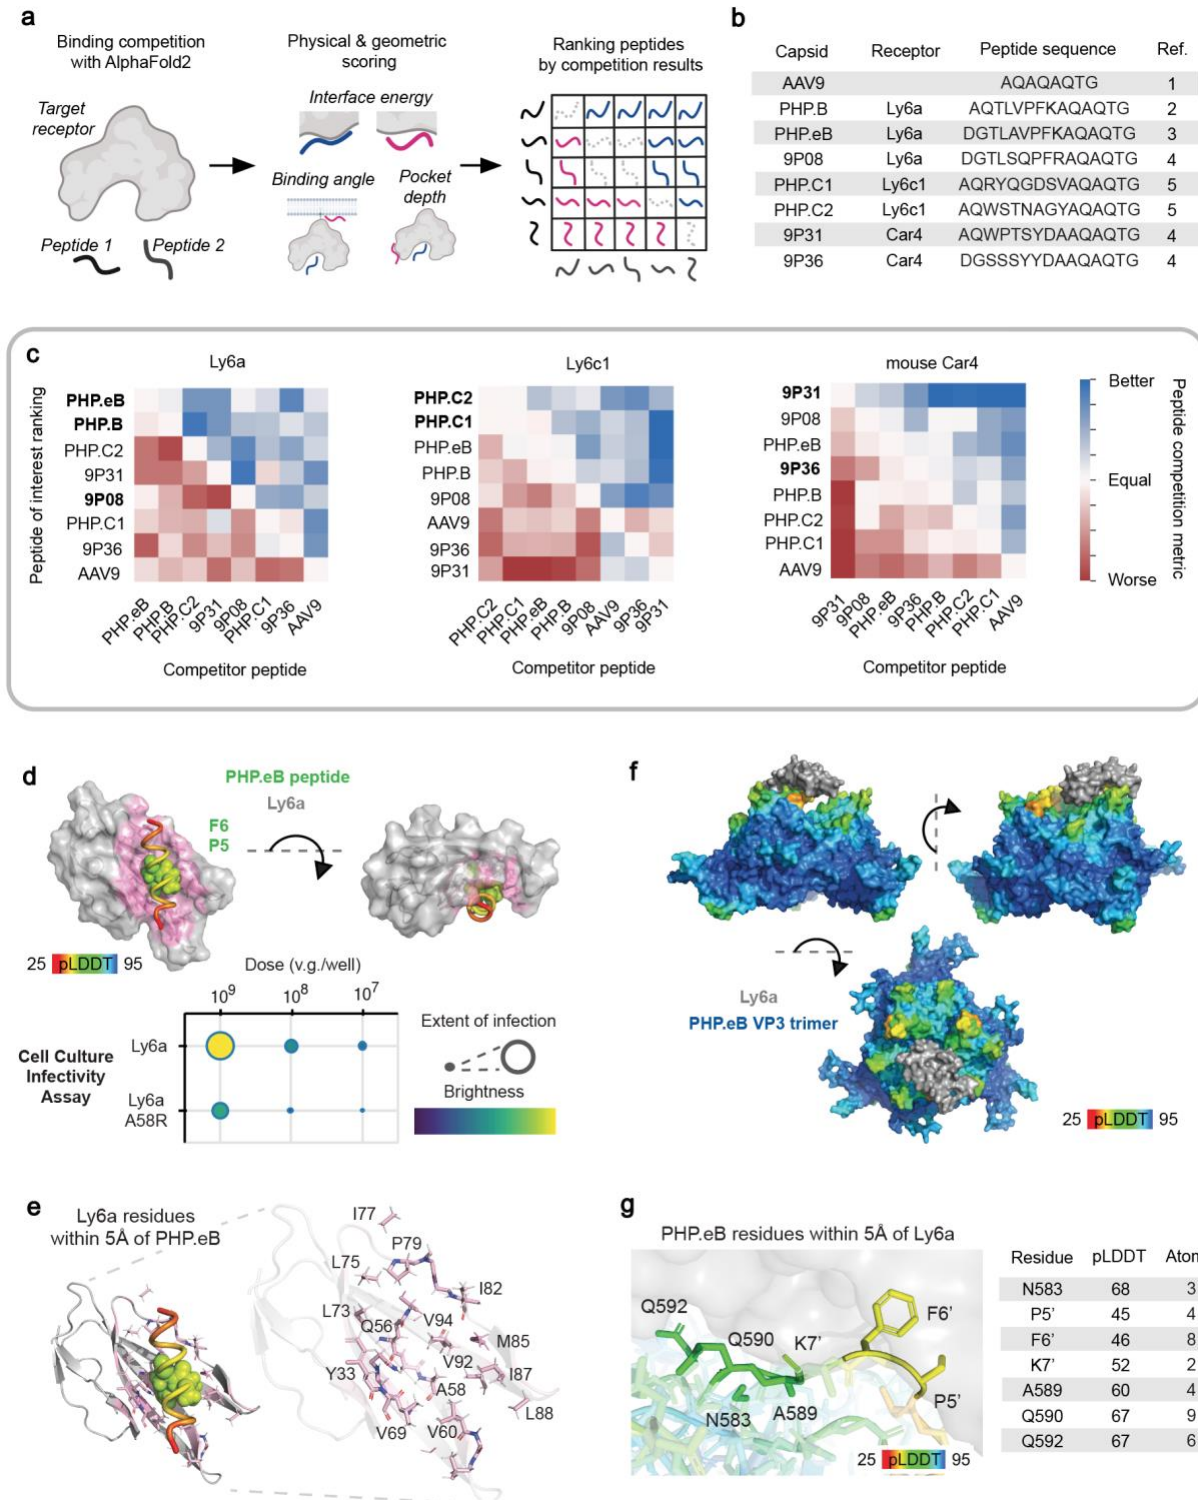

**Figure 5. In silico predictions of engineered AAV receptors and Ly6a interaction complex pose. a,** Overview of AlphaFold2-based in silico Automated Pairwise Peptide-Receptor Analysis

for Screening Engineered AAVs (APPRAISE-AAV for short). Surface peptides from AAV variants are put in pairwise binding competition using AlphaFold2. A peptide competition metric is calculated according to each peptide's interface energy, binding angle, and pocket depth (see Materials and Methods section for details) before being assembled into broader ranked matrices of interaction likelihood. Competition results reflect the relative peptide binding probability encoded in the AlphaFold2 neural network. **b**, Table of engineered AAV capsids, their confirmed receptor, and the capsid peptide sequence used in APPRAISE-AAV. References: 1: Gao et al (2004), 2: Deverman et al (2016), 3: Chan et al (2017), 4: Nonnenmacher et al (2021), 5: Ravindra Kumar et al (2020) **c**, Matrices ranking AAV peptides by their average competition metric over ten replicate conditions for Ly6a, Ly6c1, and mouse Car4. AAV peptide labels in bold indicate those experimentally identified to interact with the corresponding receptor. Metric values out of range (-100 - 100) were capped to range limits. **d**, AlphaFold2-predicted Ly6a-PHP.eB peptide complex structure. PHP.eB peptide is colored by pLDDT (predicted Local Distance Difference Test) score, a per-residue estimate of the model confidence. The highest confidence side chains, P5' and F6', are shown as spheres. Ly6a A58R mutation, chosen to disrupt the predicted peptide interaction, resulted in reduced potency in the cell culture infectivity assay. Extent of infection (Max: 0.29, Min: 0.03), Total brightness per signal area (Max: 0.61, Min: 0.16). **e**, Ly6a residues with at least 2 atoms within 5 angstroms ( $\text{\AA}$ ) of the modeled PHP.eB peptide. **f**, Complete model of the PHP.eB trimer and Ly6a complex. The AlphaFold2 structural prediction from **d** was combined with a capsid monomer-receptor structural prediction and optimized using Rosetta Remodel within the context of the AAV trimer (Supplementary Figure 6a). **g**, Zoom-in view of the PHP.eB-Ly6a binding interface in modeled PHP.eB-Ly6a complex and PHP.eB residues with at least 2 atoms within 5  $\text{\AA}$  of Ly6a.



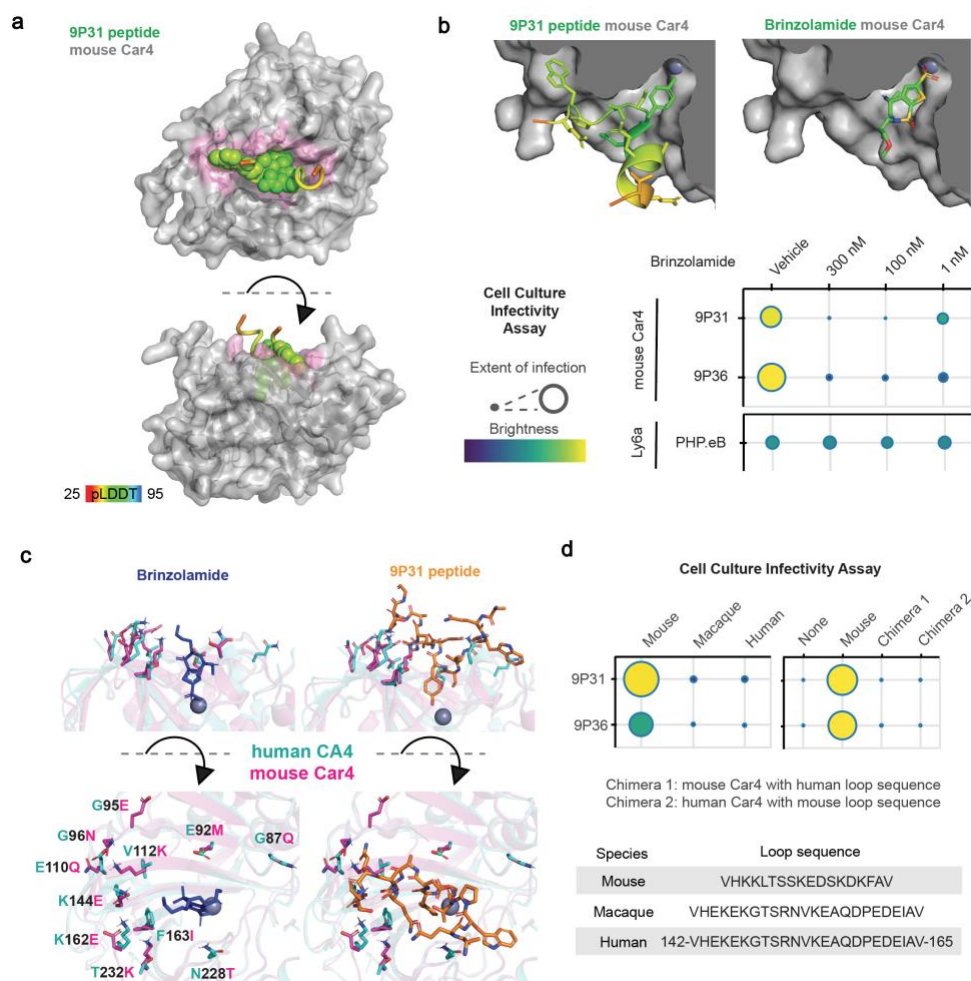

**Fig. 6. Engineered AAV interactions with carbonic anhydrase IV.** **a**, AlphaFold2-predicted mouse Car4-9P31 peptide complex structure. 9P31 peptide is colored by pLDDT score at each residue with the highest confidence side chains shown as spheres. **b**, Cut-away view of mouse Car4 catalytic pocket with modeled 9P31 peptide binding pose (*top left*) and crystallographic brinzolamide binding pose (PDB ID: 3ZNC, *top right*). Cell culture infectivity assay of brinzolamide's effects on engineered AAVs (*bottom*). Extent of infection (Max: 0.63, Min: 0.04), Total brightness per signal area (Max: 0.75, Min: 0.18) **c**, Views of amino acid side chains that differ between mouse (PDB ID: 3ZNC) and human (PDB ID: 1ZNC) carbonic anhydrase IV in relation to brinzolamide and 9P31 peptide binding poses. **d**, Potency in cell culture infectivity assay of 9P31 and 9P36 in HEK293T cells transfected with mouse, rhesus macaque, or human

carbonic anhydrase IV receptors, as well as two chimeric receptors of mouse and human carbonic anhydrase IV that exchange the loop sequences depicted. Extent of infection (*left*, Max: 0.52, Min: 0.05, *right*, Max: 0.65, Min: 0.03), Total brightness per signal area (*left*, Max: 0.78, Min: 0.46, *right*, Max: 0.75, Min: 0.13)
